# Supplementary material for: Causal Association of Cardiovascular Risk Factors and Lifestyle Behaviors With Peripheral Artery Disease: A Mendelian Randomization Approach
Source: PubMed Central journal article supplement — J Am Heart Assoc. 2022 Aug 5;11(16):e025644. doi: 10.1161/JAHA.122.025644 (PMC9496309; doi:10.1161/jaha.122.025644), 2022-08-05

## **SUPPLEMENTAL MATERIAL**

**Table S1. Post-hoc power calculation for the IVW analyses on modifiable risk factors and peripheral artery disease for analyses done in the Million Veteran Program cohort and the GoLEAD-SUMMIT cohort.**

| Risk factor              | Sample size*      | Ratio cases to controls* | R <sup>2</sup> of exposure by genetic variants† | Causal effect‡<br>(OR according to IVW) | Significance level | Power§               |
|--------------------------|-------------------|--------------------------|-------------------------------------------------|-----------------------------------------|--------------------|----------------------|
|                          | MVP/GoLEAD-SUMMIT | MVP/GoLEAD-SUMMIT        |                                                 | MVP/GoLEAD-SUMMIT                       |                    | MVP/GoLEAD-SUMMIT    |
| <b>Diabetes</b>          |                   |                          |                                                 |                                         |                    |                      |
| Type 2 diabetes          | 243,060 / 461,634 | 1:6.8 / 1:37.2           | 0.163                                           | 1.18 / 1.16                             | 0.0025             | <b>100% / 100%</b>   |
| Fasting glucose          | 243,060 / 461,634 | 1:6.8 / 1:37.2           | 0.048                                           | 1.41 <sup>a</sup> / 1.21 <sup>a</sup>   | 0.0025             | <b>100% / 93.4%</b>  |
| <b>Cholesterol</b>       |                   |                          |                                                 |                                         |                    |                      |
| LDL cholesterol          | 243,060 / 461,634 | 1:6.8 / 1:37.2           | 0.146                                           | 1.23 / 1.13                             | 0.0025             | <b>100% / 97.9%</b>  |
| HDL cholesterol          | 243,060 / 461,634 | 1:6.8 / 1:37.2           | 0.137                                           | 0.84 / 0.81                             | 0.0025             | <b>100% / 100%</b>   |
| Triglycerides            | 243,060 / 461,634 | 1:6.8 / 1:37.2           | 0.117                                           | 1.15 / 1.08                             | 0.0025             | <b>100% / 43.3%</b>  |
| <b>Smoking</b>           |                   |                          |                                                 |                                         |                    |                      |
| Smoking initiation       | 243,060 / 461,634 | 1:6.8 / 1:37.2           | 0.023                                           | 1.48 / 1.59                             | 0.0025             | <b>100% / 100%</b>   |
| Smoking cessation        | 243,060 / 461,634 | 1:6.8 / 1:37.2           | 0.001                                           | 1.25 / 1.66                             | 0.0025             | <b>3.1% / 9.9%</b>   |
| Cigarettes per day       | 243,060 / 461,634 | 1:6.8 / 1:37.2           | 0.01                                            | 1.90 / 1.87                             | 0.0025             | <b>100% / 100%</b>   |
| <b>Diet</b>              |                   |                          |                                                 |                                         |                    |                      |
| Alcohol consumption      | 243,060 / 461,634 | 1:6.8 / 1:37.2           | 0.002                                           | 0.95 / 1.87                             | 0.0025             | <b>0.4% / 50.5%</b>  |
| Coffee consumption       | 243,060 / 461,634 | 1:6.8 / 1:37.2           | 0.0048                                          | 1.01 <sup>b</sup> / 1.13 <sup>b</sup>   | 0.0025             | <b>0.2% / 1.8%</b>   |
| <b>Physical activity</b> |                   |                          |                                                 |                                         |                    |                      |
| MVPA                     | 243,060 / 461,634 | 1:6.8 / 1:37.2           | 0.00073                                         | 1.12 / 0.54                             | 0.0025             | <b>0.6% / 11.2%</b>  |
| Sedentary behaviour      | 243,060 / 461,634 | 1:6.8 / 1:37.2           | 0.0008                                          | 1.19 / 0.78                             | 0.0025             | <b>1.3% / 1.2%</b>   |
| <b>Sleep</b>             |                   |                          |                                                 |                                         |                    |                      |
| Insomnia                 | 243,060 / 461,634 | 1:6.8 / 1:37.2           | 0.026                                           | 1.10 / 1.20                             | 0.0025             | <b>31.2% / 56.6%</b> |
| Sleep duration           | 243,060 / 461,634 | 1:6.8 / 1:37.2           | 0.0069                                          | 0.69 <sup>c</sup> / 0.63                | 0.0025             | <b>98% / 87.3%</b>   |
| Short sleep duration     | 243,060 / 461,634 | 1:6.8 / 1:37.2           | NA                                              | 1.20 / 1.56                             | 0.0025             | <b>NA</b>            |
| Long sleep duration      | 243,060 / 461,634 | 1:6.8 / 1:37.2           | NA                                              | 0.82 / 0.75                             | 0.0025             | <b>NA</b>            |
| <b>Education</b>         |                   |                          |                                                 |                                         |                    |                      |
| Educational level        | 243,060 / 461,634 | 1:6.8 / 1:37.2           | 0.11                                            | 0.58 / 0.50                             | 0.0025             | <b>100% / 100%</b>   |

\* Sample size and ratio cases to controls according to the outcome GWAS on PAD, in both the MVP and the GoLEAD-SUMMIT cohort

† Variance explained of exposure by genetic variants as reported in GWASs on the different modifiable risk factors

‡ OR per 1-SD change for continuous exposures

§ Calculated using an online power calculation tool (<https://sb452.shinyapps.io/power/>)

<sup>a</sup> OR per 1-SD increase in fasting glucose, using an SD of 0.5 mmol/L approximated from the study characteristics in the GWAS meta-analysis

<sup>b</sup> OR per 50% increase in coffee consumption. SD was not provided in GWAS meta-analysis

<sup>c</sup> OR per 1-SD increase in sleep duration, using an SD of 1.1 h as reported in the GWAS

Abbreviations: MVP: Genome wide association study on peripheral artery disease, executed by the Million veteran program; GoLEAD-SUMMIT: Genome wide association study, executed by the GoLEAD-SUMMIT

consortium: IVW = inverse-variance weighted; LDL = low-density lipoprotein; HDL = high-density lipoprotein; MVP: MVPA = moderate-to-vigorous physical activity; NA = not available; OR = odds ratio; PAD: peripheral artery disease.

Table S2A. Results of the main and sensitivity analyses of the Mendelian randomization study on cardiovascular risk factors and lifestyle behaviors with peripheral artery disease in the Million Veteran Program cohort.

| Lifestyle factors            | MR Method        |                 |                     |                  |                 |                  |                |                 |                   |                     |
|------------------------------|------------------|-----------------|---------------------|------------------|-----------------|------------------|----------------|-----------------|-------------------|---------------------|
|                              | IVW              |                 |                     | Weighted median  |                 | MR-Egger         |                |                 |                   |                     |
|                              | OR (95% CI)      | P-value         | Cochran's Q P-value | OR (95% CI)      | P-value         | OR (95% CI)      | P-value        | Intercept value | Intercept P-value | Cochran's Q P-value |
| <b>Diabetes</b>              |                  |                 |                     |                  |                 |                  |                |                 |                   |                     |
| Type 2 diabetes              | 1.18 (1.15;1.21) | <b>2.12E-34</b> | 5.76E-20            | 1.19 (1.15;1.23) | <b>6.00E-21</b> | 1.12 (1.06;1.17) | <b>2.16E-5</b> | 0.004           | 0.012             | 8.41E-19            |
| Fasting glucose              | 1.41 (1.11;1.79) | 5.23E-3         | 1.55E-11            | 1.18 (0.98;1.43) | 0.076           | 0.96 (0.63;1.46) | 0.85           | 0.013           | 0.032             | 1.72E-9             |
| <b>Lipid metabolism</b>      |                  |                 |                     |                  |                 |                  |                |                 |                   |                     |
| LDL-C                        | 1.23 (1.13;1.33) | <b>2.68E-6</b>  | 5.73E-15            | 1.26 (1.16;1.36) | <b>3.00E-8</b>  | 1.33 (1.15;1.54) | <b>1.20E-4</b> | -0.006          | 0.18              | 2.61E-14            |
| HDL-C                        | 0.84 (0.77;0.91) | <b>4.91E-5</b>  | 6.07E-16            | 0.90 (0.84;0.97) | 6.09E-3         | 0.92 (0.81;1.04) | 0.19           | -0.007          | 0.06              | 1.46E-14            |
| Triglycerides                | 1.15 (1.03;1.28) | 0.014           | 1.05E-11            | 1.17 (1.07;1.27) | <b>5.37E-4</b>  | 1.08 (0.92;1.27) | 0.35           | 0.005           | 0.35              | 1.69E-11            |
| <b>Smoking</b>               |                  |                 |                     |                  |                 |                  |                |                 |                   |                     |
| Smoking initiation           | 1.48 (1.38;1.59) | <b>1.28E-28</b> | 6.83E-8             | 1.48 (1.35;1.62) | <b>1.45E-17</b> | 1.98 (1.47;2.65) | <b>5.50E-6</b> | -0.006          | 0.05              | 1.39E-7             |
| Smoking cessation            | 1.25 (0.92;1.70) | 0.15            | 9.36E-11            | 1.29 (0.97;1.72) | 0.085           | 0.59 (0.25;1.42) | 0.24           | 0.028           | 0.07              | 7.26E-9             |
| Number of cigarettes per day | 1.90 (1.62;2.24) | <b>8.20E-15</b> | 0.001               | 1.71 (1.42;2.06) | <b>1.04E-8</b>  | 1.66 (1.25;2.20) | <b>3.98E-4</b> | 0.004           | 0.25              | 0.00129             |
| <b>Diet</b>                  |                  |                 |                     |                  |                 |                  |                |                 |                   |                     |
| Alcohol consumption          | 1.12 (0.84;1.49) | 0.42            | 2.37E-10            | 1.19 (0.85;1.67) | 0.31            | 1.20 (0.62;2.31) | 0.59           | -0.001          | 0.83              | 1.59E-10            |
| Coffee consumption           | 1.19 (0.92;1.54) | 0.18            | 4.02E-6             | 1.10 (0.91;1.33) | 0.34            | 1.08 (0.65;1.80) | 0.75           | 0.005           | 0.67              | 2.57E-6             |
| <b>Physical activity</b>     |                  |                 |                     |                  |                 |                  |                |                 |                   |                     |
| MVPA                         | 0.95 (0.37;2.44) | 0.91            | 3.76E-04            | 0.97 (0.45;2.09) | 0.95            | 0.16 (0.01;3.13) | 0.23           | 0.32            | 0.22              | 0.00191             |
| Sedentary behavior           | 1.01 (0.65;1.57) | 0.98            | 0.142               | 1.02 (0.67;1.55) | 0.94            | NA               | -              | -0.003          | 0.99              | 0.0655              |
| <b>Sleep</b>                 |                  |                 |                     |                  |                 |                  |                |                 |                   |                     |
| Insomnia                     | 1.10 (1.05;1.14) | <b>1.53E-5</b>  | 2.3E-10             | 1.12 (1.06;1.18) | <b>2.06E-5</b>  | 0.99 (0.84;1.17) | 0.92           | 0.005           | 0.23              | 2.98E-10            |
| Sleep duration               | 0.69 (0.54;0.87) | <b>1.99E-3</b>  | 1.21E-11            | 0.76 (0.58;0.98) | 0.033           | 1.00 (0.84;1.17) | 1.00           | -0.006          | 0.40              | 1.30E-11            |
| Short sleep duration         | 1.20 (1.04;1.38) | 0.013           | 0.0676              | 1.18 (0.99;1.40) | 0.072           | 1.39 (0.84;2.29) | 0.20           | -0.005          | 0.54              | 0.0586              |
| Long sleep duration          | 0.82 (0.59;1.12) | 0.22            | 5.19E-5             | 0.92 (0.74;1.15) | 0.47            | 2.09 (1.01;4.31) | 0.046          | -0.063          | 0.01              | 0.0334              |

| Education         |                  |                 |          |                  |                 |                  |                |      |      |          |
|-------------------|------------------|-----------------|----------|------------------|-----------------|------------------|----------------|------|------|----------|
| Educational level | 0.58 (0.54;0.62) | <b>1.50E-62</b> | 2.01E-11 | 0.58 (0.53;0.64) | <b>3.79E-32</b> | 0.59 (0.47;0.75) | <b>1.02E-5</b> | 0.00 | 0.80 | 1.83E-11 |

Odds ratios display the association of listed cardiovascular risk factors and lifestyle behaviors with peripheral artery disease. The P-values of the OR are displayed in bold if below the Bonferroni-corrected threshold of 0.00294, and in bold-italic if between 0.00294 and 0.05.

Abbreviations: CI = confidence interval; HDL-C = High-density lipoprotein cholesterol; IVW = inverse-variance weighted; LDL-C = Low-density lipoprotein cholesterol; MR = Mendelian randomization; MR-PRESSO = Mendelian Randomization Pleiotropy RESidual Sum and Outlier; MVPA = Moderate-to-vigorous physical activity; NA = not applicable; OR = odds ratio; SD = standard deviation

**Table S2B. Results of the main and sensitivity analyses of the Mendelian randomization study on cardiovascular risk factors and lifestyle behaviors with peripheral artery disease in the Million Veteran Program cohort.**

| Risk factors                 | MR Method        |                 |                     |                       |                 |                  |                 |                     |                         |
|------------------------------|------------------|-----------------|---------------------|-----------------------|-----------------|------------------|-----------------|---------------------|-------------------------|
|                              | IVW              |                 |                     | Contamination Mixture |                 | MR-PRESSO        |                 |                     |                         |
|                              | OR (95% CI)      | P-value         | Cochran's Q P-value | OR (95% CI)           | P-value         | OR (95% CI)      | P-value         | Global test P-value | Distortion test P-value |
| <b>Diabetes</b>              |                  |                 |                     |                       |                 |                  |                 |                     |                         |
| Type 2 diabetes              | 1.18 (1.15;1.21) | <b>2.12E-34</b> | 5.76E-20            | 1.19 (1.16;1.22)      | <b>2.87E-19</b> | 1.18 (1.15;1.21) | <b>1.38E-30</b> | <0.0001             | 0.93                    |
| Fasting glucose              | 1.41 (1.11;1.79) | 5.23E-3         | 1.55E-11            | 1.18 (1.03;1.39)      | 0.03            | 1.26 (1.05;1.51) | 0.02            | <0.0001             | <b>0.05</b>             |
| <b>Lipid metabolism</b>      |                  |                 |                     |                       |                 |                  |                 |                     |                         |
| LDL-C                        | 1.23 (1.13;1.33) | <b>2.68E-6</b>  | 5.73E-15            | 1.27 (1.15;1.36)      | <b>1.05E-5</b>  | 1.22 (1.14;1.31) | <b>8.14E-7</b>  | <0.0001             | 0.963                   |
| HDL-C                        | 0.84 (0.77;0.91) | <b>4.91E-5</b>  | 6.07E-16            | 0.85 (0.72;0.90)      | <b>9.64E-6</b>  | 0.84 (0.78;0.89) | <b>2.12E-6</b>  | <0.0001             | 0.92                    |
| Triglycerides                | 1.15 (1.03;1.28) | 0.014           | 1.05E-11            | 1.16 (1.09;1.24)      | <b>1.24E-3</b>  | 1.16 (1.06;1.27) | 0.003           | <0.0001             | 0.78                    |
| <b>Smoking</b>               |                  |                 |                     |                       |                 |                  |                 |                     |                         |
| Smoking initiation           | 1.48 (1.38;1.59) | <b>1.28E-28</b> | 6.83E-8             | 1.72 (1.59;1.89)      | <b>2.73E-20</b> | 1.47 (1.38;1.58) | <b>1.49E-24</b> | <0.0001             | 0.87                    |
| Smoking cessation            | 1.25 (0.92;1.70) | 0.15            | 9.36E-11            | NA                    | -               | 1.31 (0.99;1.73) | 0.07            | <0.0001             | 0.66                    |
| Number of cigarettes per day | 1.90 (1.62;2.24) | <b>8.20E-15</b> | 0.001               | 1.89 (1.68;2.41)      | <b>3.81E-10</b> | 1.85 (1.61;2.12) | <b>3.39E-11</b> | 0.003               | 0.69                    |
| <b>Diet</b>                  |                  |                 |                     |                       |                 |                  |                 |                     |                         |
| Alcohol consumption          | 1.12 (0.84;1.49) | 0.42            | 2.37E-10            | 1.60 (0.91;2.56)      | 0.09            | 1.27 (0.98;1.64) | 0.07            | <0.0001             | 0.57                    |
| Coffee consumption           | 1.19 (0.92;1.54) | 0.18            | 4.02E-6             | 1.19 (1.02;1.65)      | 0.03            | 1.16 (1.00;1.34) | 0.07            | 0.0001              | 0.69                    |
| <b>Physical activity</b>     |                  |                 |                     |                       |                 |                  |                 |                     |                         |
| MVPA                         | 0.95 (0.37;2.44) | 0.91            | 3.76E-04            | NA                    | -               | 1.22 (0.74;2.03) | 0.48            | 0.002               | 0.18                    |
| Sedentary behavior           | 1.01 (0.65;1.57) | 0.98            | 0.142               | 1.22 (0.30;3.56)      | 0.55            | 1.01 (0.65;1.57) | 0.98            | 0.213               | NA                      |
| <b>Sleep</b>                 |                  |                 |                     |                       |                 |                  |                 |                     |                         |
| Insomnia                     | 1.10 (1.05;1.14) | <b>1.53E-5</b>  | 2.3E-10             | 1.23 (1.16;1.29)      | <b>1.62E-7</b>  | 1.10 (1.05;1.14) | <b>1.40E-5</b>  | <0.0001             | 0.98                    |
| Sleep duration               | 0.69 (0.54;0.87) | <b>1.99E-3</b>  | 1.21E-11            | 0.62 (0.44;0.77)      | 4.02E-3         | 0.75 (0.61;0.93) | 0.01            | <0.0001             | 0.26                    |
| Short sleep duration         | 1.20 (1.04;1.38) | 1.31E-2         | 0.0676              | 1.28 (1.08;1.48)      | 0.018           | 1.20 (1.04;1.38) | 0.02            | 0.071               | NA                      |

|                     |                  |                 |          |                  |                 |                  |                 |        |      |
|---------------------|------------------|-----------------|----------|------------------|-----------------|------------------|-----------------|--------|------|
| Long sleep duration | 0.82 (0.59;1.12) | 0.22            | 5.19E-5  | 0.96 (0.80;1.18) | 0.65            | 0.85 (0.69;1.06) | 0.22            | 0.0005 | 0.68 |
| <b>Education</b>    |                  |                 |          |                  |                 |                  |                 |        |      |
| Educational level   | 0.58 (0.54;0.62) | <b>1.50E-62</b> | 2.01E-11 | 0.44 (0.41;0.51) | <b>6.12E-38</b> | 0.58 (0.53;0.61) | <b>3.86E-57</b> | <4E-5  | 0.93 |

Odds ratios display the association of listed cardiovascular risk factors and lifestyle behaviors with peripheral artery disease. The P-values of the OR are displayed in bold if below the Bonferroni-corrected threshold of 0.00294, and in bold-italic if between 0.00294 and 0.05.

Abbreviations: CI = confidence interval; HDL-C = High-density lipoprotein cholesterol; IVW = inverse-variance weighted; LDL-C = Low-density lipoprotein cholesterol; MR = Mendelian randomization; MR-PRESSO = Mendelian Randomization Pleiotropy RESidual Sum and Outlier; MVPA = Moderate-to-vigorous physical activity; NA = not applicable; OR = odds ratio; SD = standard deviation

Table S3A. Results of the main and sensitivity analyses the this Mendelian randomization study on cardiovascular risk factors and lifestyle behaviors with peripheral artery disease in the GoELAD-SUMMIT cohort.

|                              | MR Method         |                 |                     |                  |                 |                  |                |                 |                   |                     |
|------------------------------|-------------------|-----------------|---------------------|------------------|-----------------|------------------|----------------|-----------------|-------------------|---------------------|
|                              | IVW               |                 |                     | Weighted median  |                 | MR-Egger         |                |                 |                   |                     |
| Lifestyle factors            | OR (95% CI)       | P-value         | Cochran's Q P-value | OR (95% CI)      | P-value         | OR (95% CI)      | P-value        | Intercept value | Intercept P-value | Cochran's Q P-value |
| <b>Diabetes</b>              |                   |                 |                     |                  |                 |                  |                |                 |                   |                     |
| Type 2 diabetes              | 1.16 (1.12;1.21)  | <b>3.71E-14</b> | <0.0001             | 1.11 (1.04;1.18) | <b>0.0014</b>   | 1.02 (0.94;1.11) | 0.57           | 0.01            | 3.37E-4           | <0.0001             |
| Fasting glucose              | 1.21 (0.91;1.61)  | 0.20            | 0.0126              | 1.15 (0.82;1.62) | 0.40            | 1.06 (0.62;1.79) | 0.84           | 0.004           | 0.55              | 0.01                |
| <b>Lipid metabolism</b>      |                   |                 |                     |                  |                 |                  |                |                 |                   |                     |
| LDL-C                        | 1.13 (0.99;1.30)  | 0.07            | <0.0001             | 1.13 (1.00;1.29) | 0.052           | 1.34 (1.06;1.69) | 0.013          | -0.01           | 0.08              | <0.0001             |
| HDL-C                        | 0.81 (0.73;0.91)  | <b>2.14E-4</b>  | <0.0001             | 0.78 (0.68;0.90) | <b>8.26E-4</b>  | 0.83 (0.69;0.99) | 0.038          | -0.001          | 0.76              | <0.0001             |
| Triglycerides                | 1.08 (0.93;1.25)  | 0.31            | <0.0001             | 1.13 (0.98;1.31) | 0.082           | 1.25 (1.02;1.54) | 0.033          | -0.01           | 0.05              | 0.0003              |
| <b>Smoking</b>               |                   |                 |                     |                  |                 |                  |                |                 |                   |                     |
| Smoking initiation           | 1.59 (1.42;1.76)  | <b>2.87E-17</b> | <0.0001             | 1.70 (1.46;1.97) | <b>2.29E-12</b> | 2.78 (1.76;4.38) | <b>1.08E-5</b> | -0.01           | 0.01              | <0.0001             |
| Smoking cessation            | 1.66 (1.12;2.45)  | 0.012           | 0.001               | 1.78 (1.17;2.70) | 0.0067          | 0.78 (0.27;2.23) | 0.65           | 0.03            | 0.13              | 2.80E-3             |
| Number of cigarettes per day | 1.87 (1.49;2.36)  | <b>8.66E-8</b>  | 0.256               | 2.26 (1.61;3.16) | <b>2.26E-6</b>  | 2.09 (1.40;3.13) | <b>3.39E-4</b> | -0.004          | 0.52              | 0.24                |
| <b>Diet</b>                  |                   |                 |                     |                  |                 |                  |                |                 |                   |                     |
| Alcohol consumption          | 1.87 (1.27;2.75)  | <b>0.0015</b>   | 3.00E-4             | 2.41 (1.48;3.91) | <b>3.81E-4</b>  | 3.79 (1.85;7.75) | <b>2.66E-4</b> | -0.01           | 0.02              | 0.0001              |
| Coffee consumption           | 1.13 (0.75;1.69)  | 0.56            | <0.0001             | 1.00 (0.73;1.37) | 1.00            | 1.08 (0.50;2.35) | 0.84           | 0.002           | 0.90              | 0.0002              |
| <b>Physical activity</b>     |                   |                 |                     |                  |                 |                  |                |                 |                   |                     |
| MVPA                         | 0.54 (0.10;2.99)  | 0.48            | 4.00E-4             | 1.27 (0.34;4.70) | 0.72            | -                | -              | -               | -                 | -                   |
| Sedentary behavior           | 0.78 (0.4;1.35)   | 0.37            | 0.32                | 0.76 (0.40;1.42) | 0.34            | -                | -              | -               | -                 | -                   |
| <b>Sleep</b>                 |                   |                 |                     |                  |                 |                  |                |                 |                   |                     |
| Insomnia                     | 1.20 (1.13;1.28)  | <b>1.06E-9</b>  | 0.002               | 1.21 (1.12;1.31) | <b>3.50E-6</b>  | 1.28 (1.02;1.63) | 0.037          | -0.003          | 0.57              | <0.0001             |
| Sleep duration               | 0.63 (0.48;0.83)  | <b>8.28E-4</b>  | 0.093               | 0.51 (0.35;0.75) | <b>7.10E-4</b>  | 0.90 (0.31;2.56) | 0.84           | -0.01           | 0.49              | 0.087               |
| Short sleep duration         | 1.56 (1.25;1.95)  | <b>8.8E-5</b>   | 0.30                | 1.49 (1.10;2.02) | 0.01            | 1.10 (0.51;2.37) | 0.82           | 0.01            | 0.35              | 0.30                |
| Long sleep duration          | 0.75 (0.56; 1.00) | 0.053           | 0.092               | 0.72 (0.53;0.98) | 0.03            | 1.14 (0.50;2.56) | 0.76           | -0.03           | 0.29              | 0.12                |
| <b>Education</b>             |                   |                 |                     |                  |                 |                  |                |                 |                   |                     |

|                   |                  |                 |         |                  |                 |                  |                |      |      |         |
|-------------------|------------------|-----------------|---------|------------------|-----------------|------------------|----------------|------|------|---------|
| Educational level | 0.50 (0.45;0.56) | <b>2.63E-38</b> | <0.0001 | 0.44 (0.38;0.52) | <b>5.24E-25</b> | 0.51 (0.35;0.75) | <b>4.61E-4</b> | 0.00 | 0.91 | <0.0001 |
|-------------------|------------------|-----------------|---------|------------------|-----------------|------------------|----------------|------|------|---------|

Odds ratios display the association of listed cardiovascular risk factors and lifestyle behaviors with peripheral artery disease. The P-values of the OR are displayed in bold if below the Bonferroni-corrected threshold of 0.00294, and in bold-italic if between 0.00294 and 0.05.

Abbreviations: CI = confidence interval; HDL-C = High-density lipoprotein cholesterol; IVW = inverse-variance weighted; LDL-C = Low-density lipoprotein cholesterol; MR = Mendelian randomization; MR-PRESSO = Mendelian Randomization Pleiotropy RESidual Sum and Outlier; MVPA = Moderate-to-vigorous physical activity; NA = not applicable; OR = odds ratio; SD = standard deviation

**Table S3B. Results of the main and sensitivity analyses the this Mendelian randomization study on cardiovascular risk factors and lifestyle behaviors with peripheral artery disease in the GoELAD-SUMMIT cohort.**

| Risk factors                 | MR Method        |          |                     |                       |         |                  |          |                     |                         |
|------------------------------|------------------|----------|---------------------|-----------------------|---------|------------------|----------|---------------------|-------------------------|
|                              | IVW              |          |                     | Contamination Mixture |         | MR-PRESSO        |          |                     |                         |
|                              | OR (95% CI)      | P-value  | Cochran's Q P-value | OR (95% CI)           | P-value | OR (95% CI)      | P-value  | Global test P-value | Distortion test P value |
| Diabetes                     |                  |          |                     |                       |         |                  |          |                     |                         |
| Type 2 diabetes              | 1.16 (1.12;1.21) | 3.71E-14 | <0.0001             | 1.14 (1.05;1.20)      | 1.56E-3 | 1.15 (1.11;1.19) | 1.17E-12 | <0.0001             | 0.61                    |
| Fasting glucose              | 1.21 (0.91;1.61) | 0.20     | 0.0126              | 1.11 (0.81;1.42)      | 0.52    | 1.21 (0.91;1.61) | 0.21     | 0.017               | NA                      |
| Lipid metabolism             |                  |          |                     |                       |         |                  |          |                     |                         |
| LDL-C                        | 1.13 (0.99;1.30) | 0.07     | <0.0001             | 1.18 (1.08;1.29)      | 0.0025  | 1.15 (1.05;1.26) | 0.0045   | <0.0001             | 0.77                    |
| HDL-C                        | 0.81 (0.73;0.91) | 2.14E-4  | <0.0001             | 0.72 (0.62;0.83)      | 6.95E-4 | 0.81 (0.73;0.90) | 0.0001   | <0.0001             | 0.99                    |
| Triglycerides                | 1.08 (0.93;1.25) | 0.31     | <0.0001             | 1.14 (1.01;1.29)      | 0.034   | 1.14 (1.02;1.28) | 0.027    | <0.0001             | 0.47                    |
| Smoking                      |                  |          |                     |                       |         |                  |          |                     |                         |
| Smoking initiation           | 1.59 (1.42;1.76) | 2.87E-17 | <0.0001             | 1.75 (1.54;2.10)      | 3.53E-9 | 1.57 (1.41;1.75) | 1.19E-15 | <0.0001             | 0.87                    |
| Smoking cessation            | 1.66 (1.12;2.45) | 0.012    | 0.001               | 3.11 (1.64;4.73)      | 6.48E-4 | 1.90 (1.33;2.69) | 0.0021   | 0.001               | 0.051                   |
| Number of cigarettes per day | 1.87 (1.49;2.36) | 8.66E-8  | 0.256               | 2.47 (1.90;3.11)      | 7.15E-5 | 1.87 (1.49;2.36) | 2.67E-06 | 0.22                | NA                      |
| Diet                         |                  |          |                     |                       |         |                  |          |                     |                         |
| Alcohol consumption          | 1.87 (1.27;2.75) | 0.0015   | 3.00E-4             | 2.47 (1.04;3.61)      | 0.044   | 1.87 (1.27;2.75) | 0.0021   | <0.0001             | NA                      |
| Coffee consumption           | 1.13 (0.75;1.69) | 0.56     | <0.0001             | 0.96 (0.74;1.24)      | 0.76    | 1.03 (0.73;1.47) | 0.86     | 0.0019              | 0.15                    |
| Physical activity            |                  |          |                     |                       |         |                  |          |                     |                         |
| MVPA                         | 0.54 (0.10;2.99) | 0.48     | 4.00E-4             | 1.94 (0.57;6.19)      | 0.23    | 1.94 (0.95;3.93) | 0.18     | 0.00396             | 0.0075                  |
| Sedentary behavior           | 0.78 (0.44;1.35) | 0.37     | 0.32                | 0.67 (0.16;4.03)      | 0.29    | 0.78 (0.44;1.35) | 0.44     | 0.46                | NA                      |
| Sleep                        |                  |          |                     |                       |         |                  |          |                     |                         |
| Insomnia                     | 1.20 (1.13;1.28) | 1.06E-9  | 0.002               | 1.25 (1.18;1.34)      | 4.02E-7 | 1.21 (1.14;1.27) | 1.28E-10 | 0.0021              | 0.90                    |
| Sleep duration               | 0.63 (0.48;0.83) | 8.28E-4  | 0.093               | 0.56 (0.37;1.00)      | 0.053   | 0.63 (0.48;0.83) | 0.0013   | 0.089               | NA                      |

|                      |                   |                      |         |                  |                 |                  |                 |       |      |
|----------------------|-------------------|----------------------|---------|------------------|-----------------|------------------|-----------------|-------|------|
| Short sleep duration | 1.56 (1.25;1.95)  | <b><i>8.8E-5</i></b> | 0.30    | 1.57 (1.14;2.12) | <i>0.0044</i>   | 1.56 (1.25;1.95) | <b>0.0006</b>   | 0.32  | NA   |
| Long sleep duration  | 0.75 (0.56; 1.00) | 0.053                | 0.092   | 0.63 (0.39;1.04) | 0.052           | 0.75 (0.56;1.00) | 0.10            | 0.12  | NA   |
| <b>Education</b>     |                   |                      |         |                  |                 |                  |                 |       |      |
| Educational level    | 0.50 (0.45;0.56)  | <b>2.63E-38</b>      | <0.0001 | 0.38 (0.33;0.44) | <b>8.14E-24</b> | 0.51 (0.46;0.56) | <b>2.67E-36</b> | <4E-5 | 0.90 |

Odds ratios display the association of listed cardiovascular risk factors and lifestyle behaviors with peripheral artery disease. The P-values of the OR are displayed in bold if below the Bonferroni-corrected threshold of 0.00294, and in bold-italic if between 0.00294 and 0.05.

Abbreviations: CI = confidence interval; HDL-C = High-density lipoprotein cholesterol; IVW = inverse-variance weighted; LDL-C = Low-density lipoprotein cholesterol; MR = Mendelian randomization; MR-PRESSO = Mendelian Randomization Pleiotropy RESidual Sum and Outlier; MVPA = Moderate-to-vigorous physical activity; NA = not applicable; OR = odds ratio; SD = standard deviation

Figure S1. Overview of the instrumental variable assumptions of the MR design.

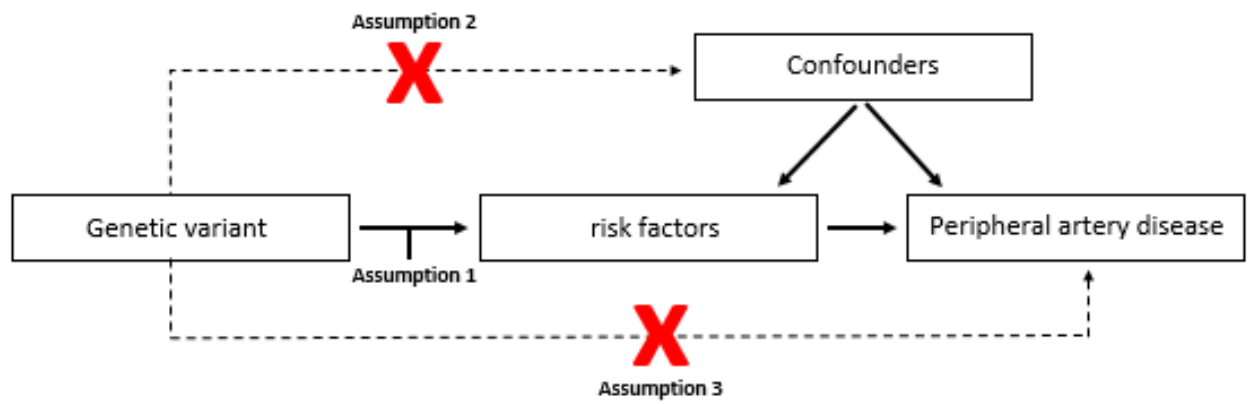

Mendelian randomization assumptions: (i) the SNPs are associated with the exposure; (ii) the SNPs are independent of confounders of the risk factor– outcome association; and (iii) the SNPs influence the outcome only via the exposure

**Figure S2. Flowchart of all included single nucleotide polymorphisms in this mendelian randomization study on cardiovascular risk factors and lifestyle behaviors with peripheral artery disease.**

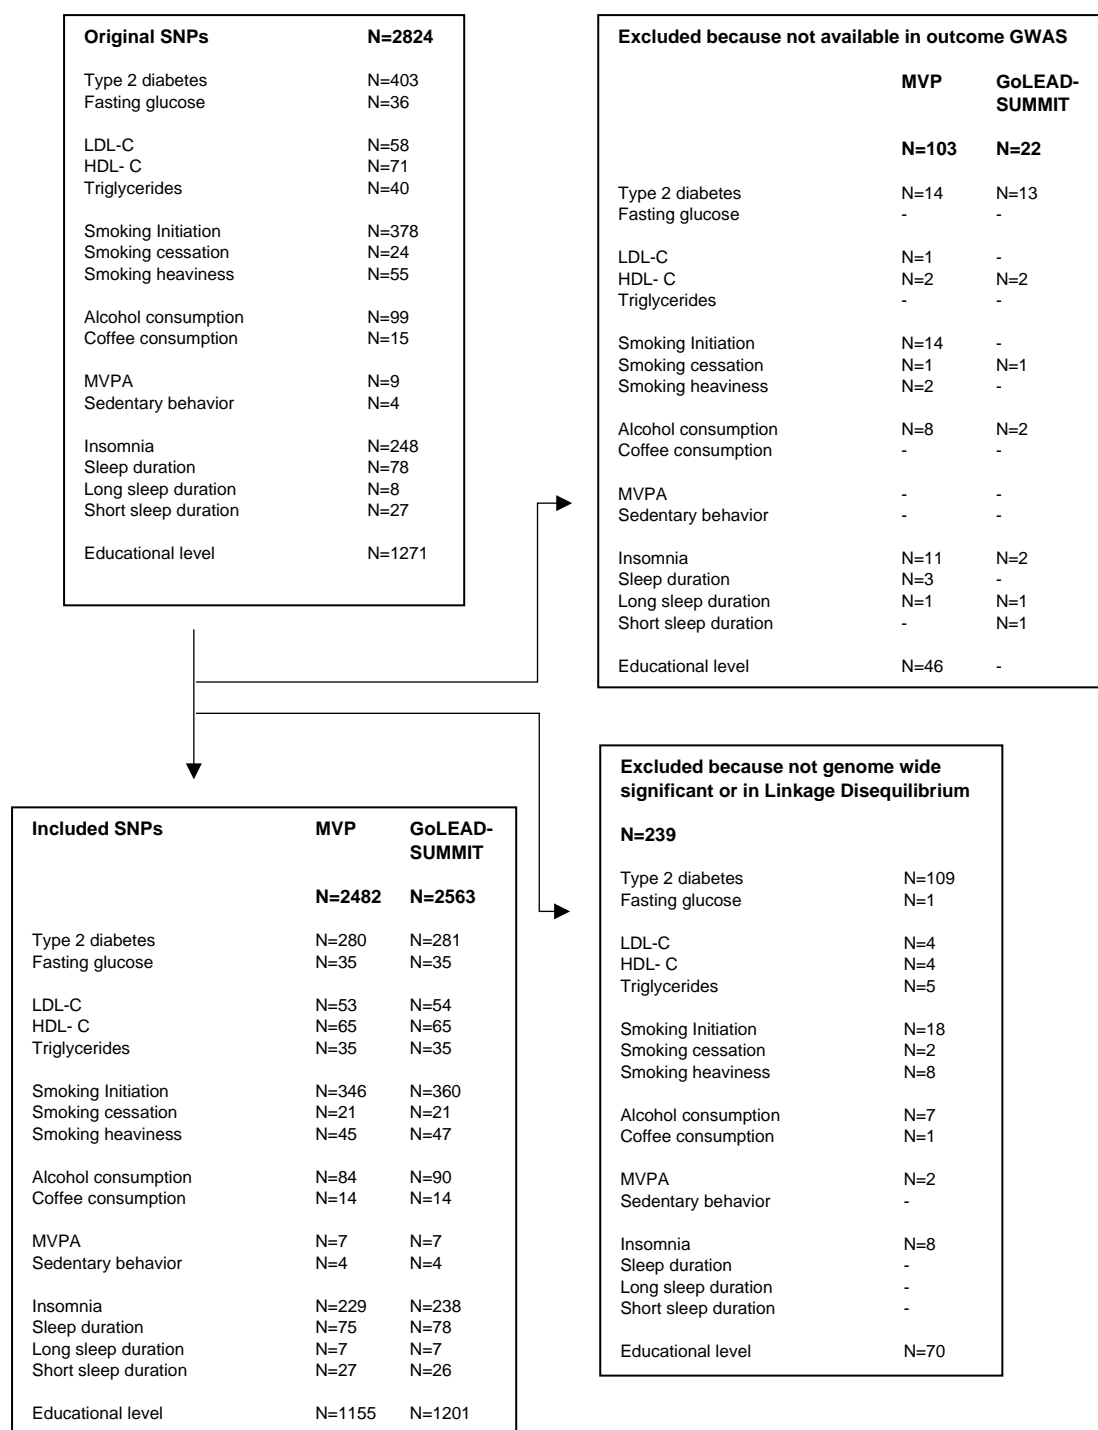

Abbreviations: SNPs = single nucleotide polymorphisms; LDL-C = Low density lipoprotein cholesterol; HDL-C = High density lipoprotein cholesterol; MVPA = Moderate to vigorous physical activity; MVP: Genome wide association study on peripheral artery disease, executed by the Million veteran program; GoLEAD-SUMMIT: Genome wide association study, executed by the GoLEAD-SUMMIT consortium

**Figure S3. Sensitivity analyses for weak IVs: Results of IVW analysis after manual exclusion of possible pleiotropic SNPs in exposures with <20 SNPs, and results of IVW analysis for MVPA, sedentary behaviour and long sleep duration using a more liberal threshold ( $P < 5 \times 10^{-6}$ ) for selecting SNPs.**

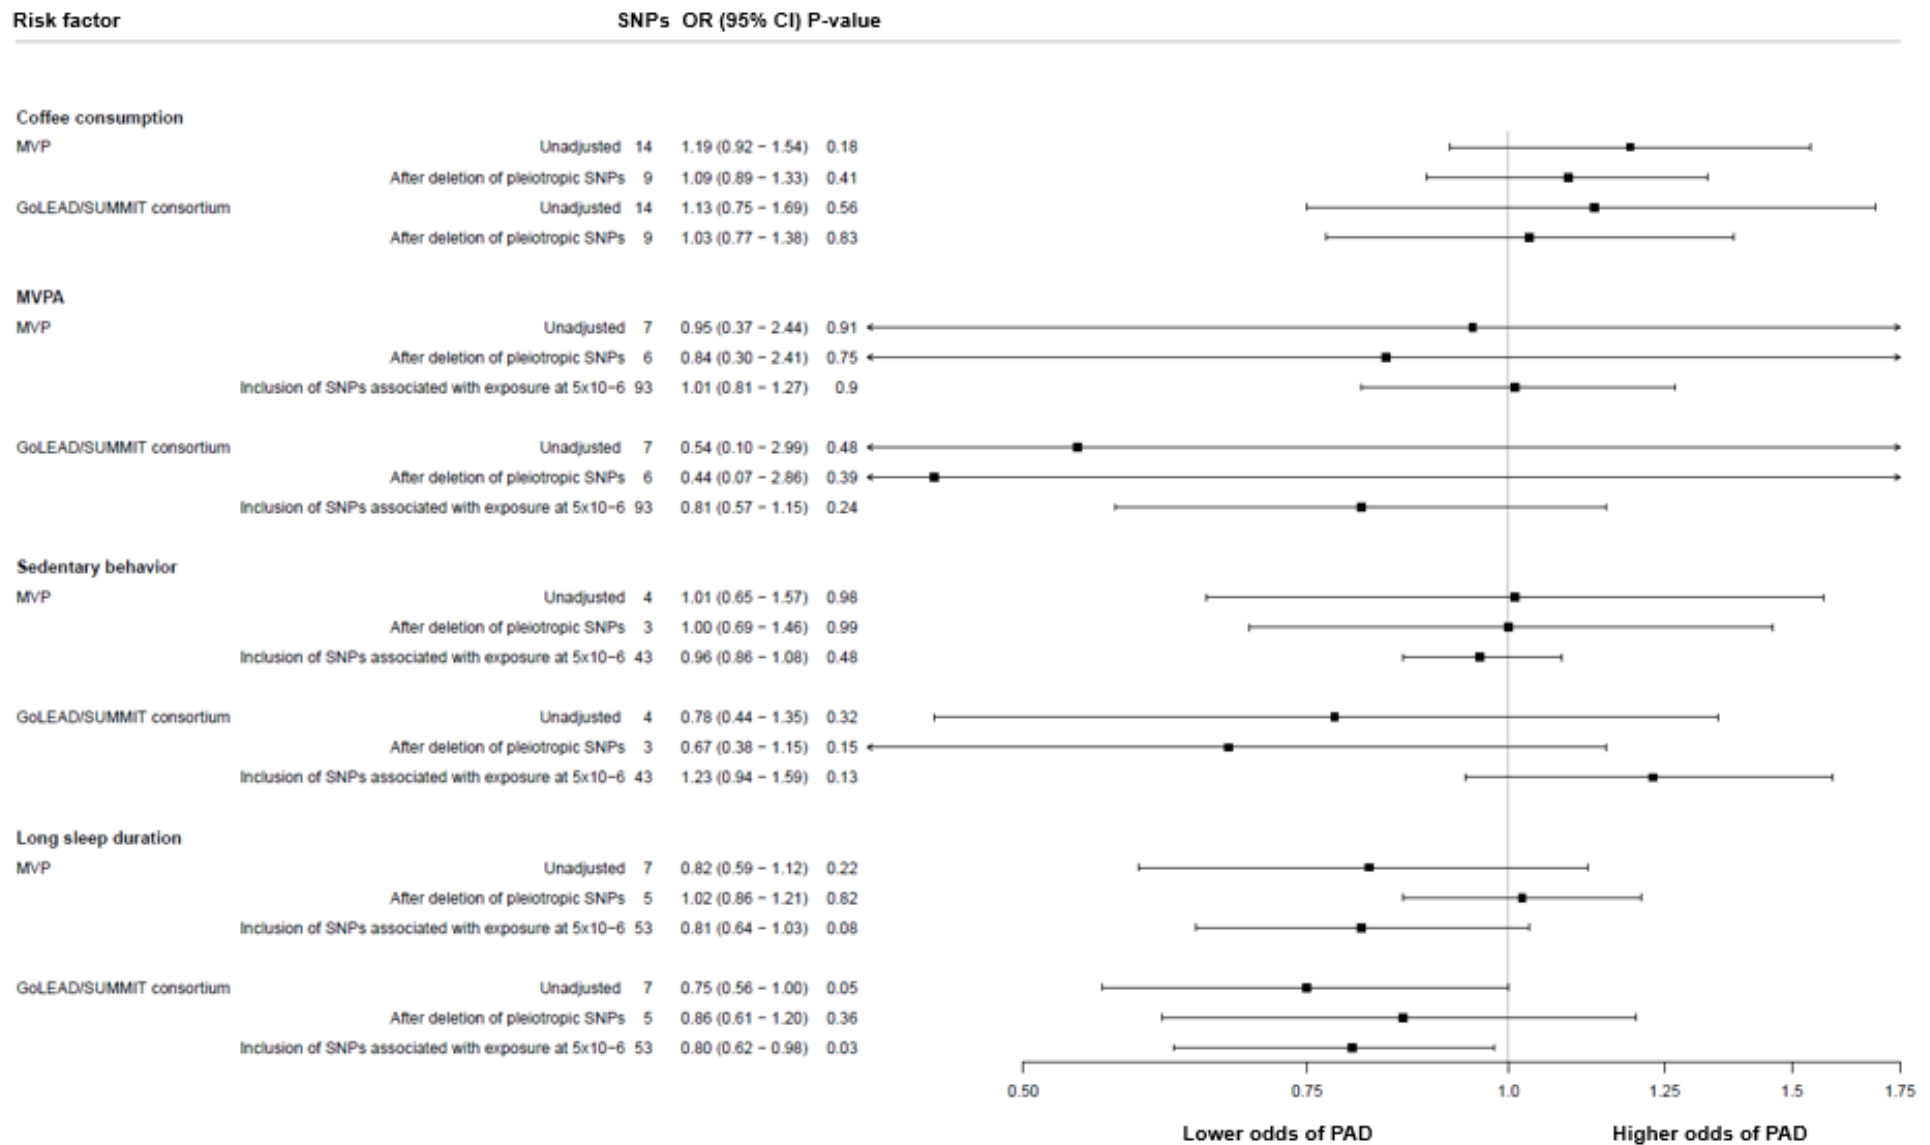

Odds ratios represent the associations of peripheral artery disease with listed risk factors.

Abbreviations: CI, confidence interval; OR, odds ratio; SNPs, single nucleotide polymorphisms MVP: Genome wide association study on peripheral artery disease, executed by the Million veteran program; MVPA; MVPA = moderate-to-vigorous physical activity, GoLEAD-SUMMIT: Genome wide association study, executed by the GoLEAD-SUMMIT consortium, IV; Instrumental variable, IVW; Inverse Variant Weighted

**Figure S4. Sensitivity analyses to adjust for the genetic correlation between potential mediators of the relationship between educational level, insomnia, type 2 diabetes and peripheral artery disease.**

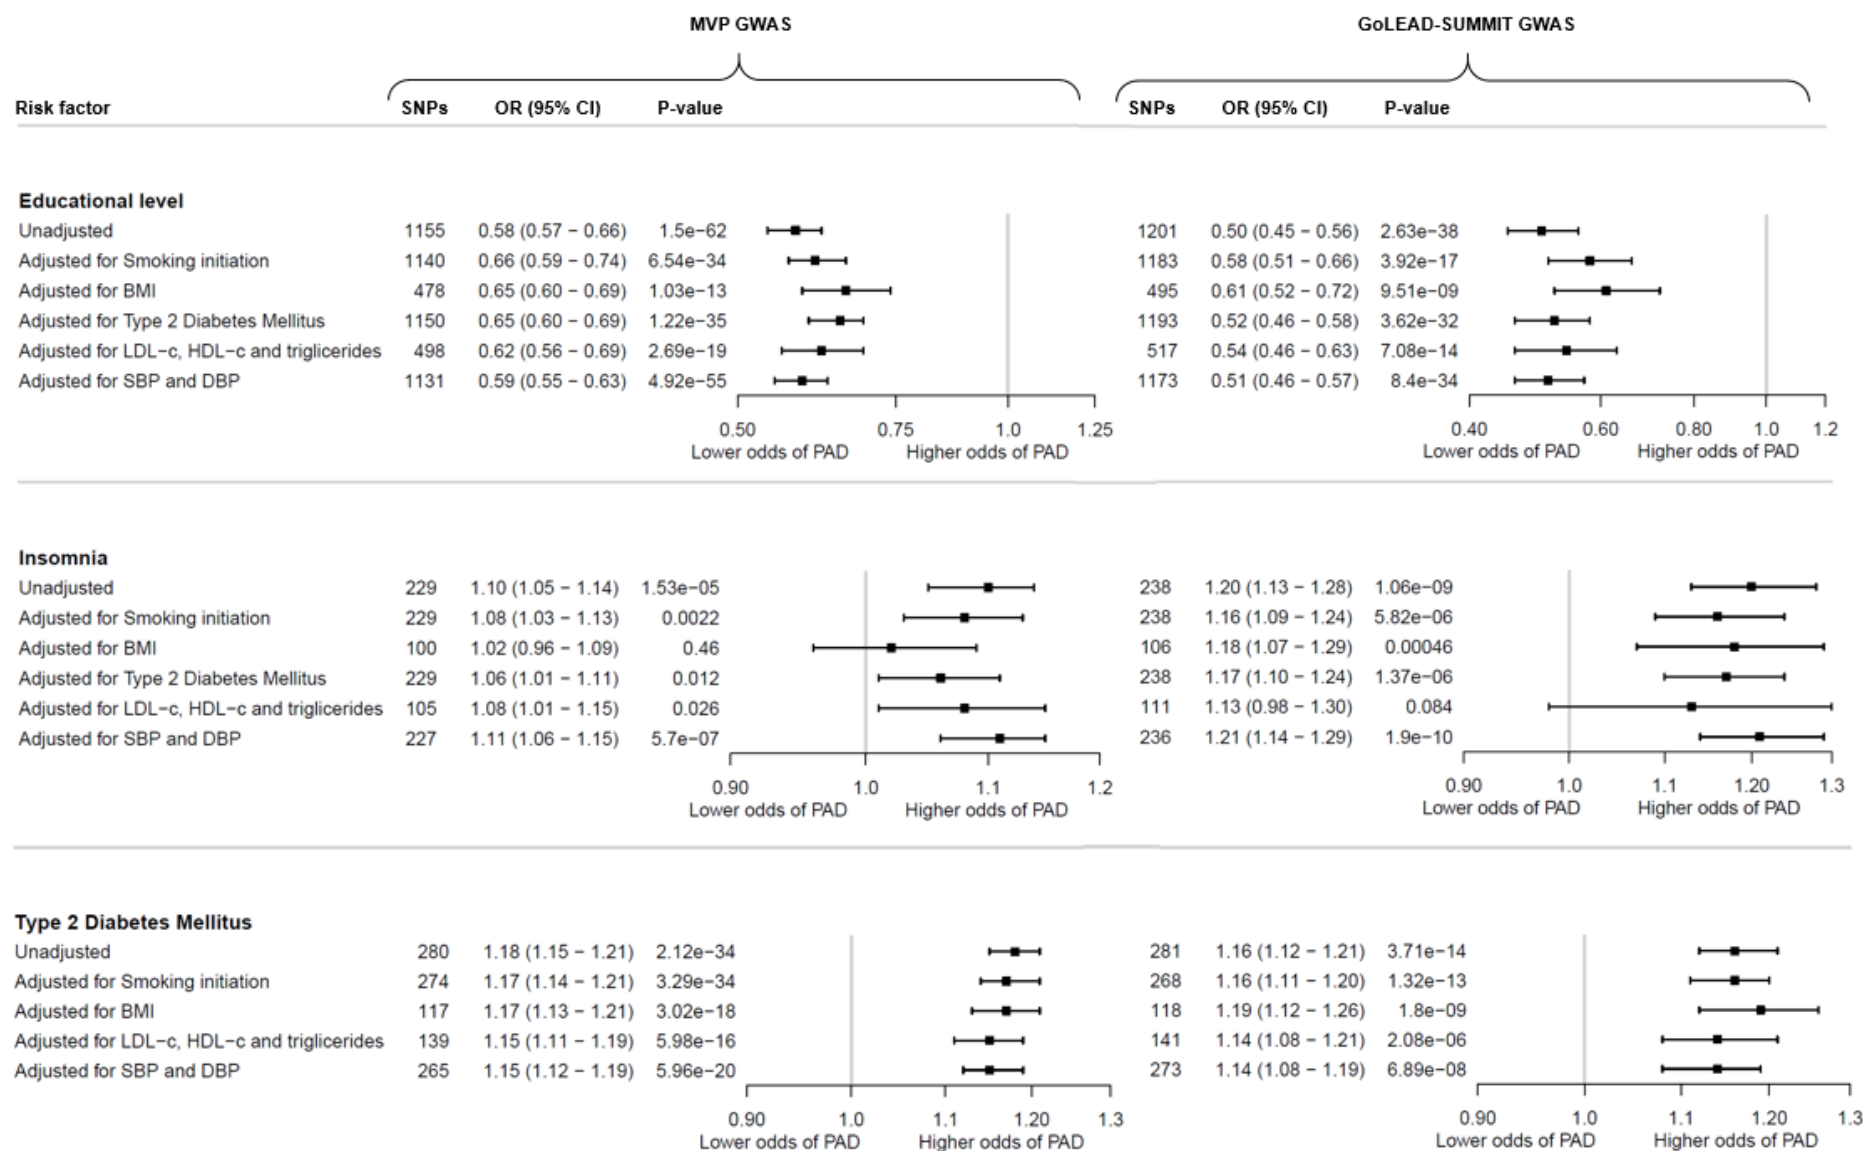

Odds ratios represent the associations of peripheral artery disease with listed risk factors.

Abbreviations: CI, confidence interval; BMI: body mass index; DBP; diastolic blood pressure; HDL, high-density lipoprotein; LDL, low-density lipoprotein; OR, odds ratio; SNPs, single nucleotide polymorphisms, SBP; systolic blood pressure, MVP: Genome wide association study on peripheral artery disease, executed by the Million veteran program; GoLEAD-SUMMIT: Genome wide association study, executed by the GoLEAD-SUMMIT consortium

Figure S5. Sensitivity analyses to adjust for the genetic correlation between lipid traits and the lipid subfractions apolipoprotein A1 and B.

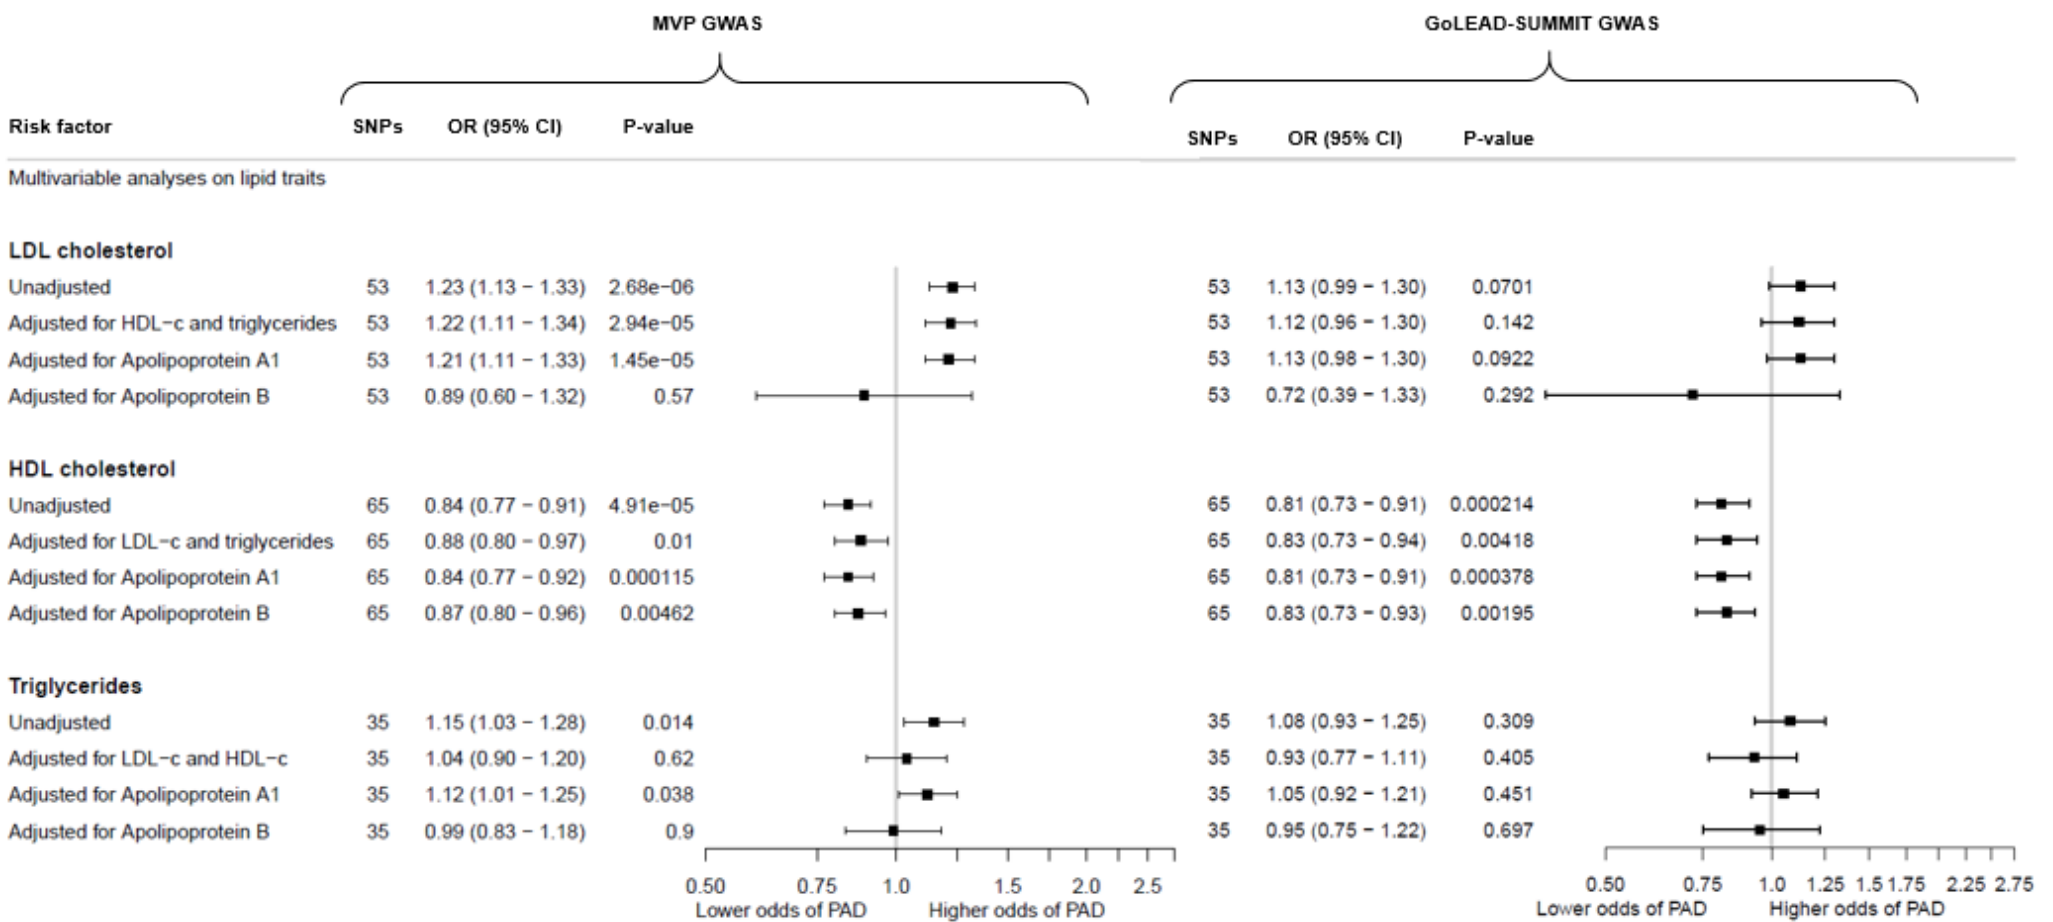

Odds ratios represent the associations of peripheral artery disease with listed risk factors.  
Abbreviations: CI, confidence interval; GWAS, genome wide association study, HDL, high-density lipoprotein; LDL, low-density lipoprotein; OR, odds ratio; SNPs, single nucleotide polymorphisms; PAD, peripheral artery disease, MVP: Genome wide association study on peripheral artery disease, executed by the Million veteran program; GoLEAD-SUMMIT: Genome wide association study, executed by the GoLEAD-SUMMIT consortium.

**Figure S6A. The association between the SNPs and type 2 diabetes versus the association between the SNPs and peripheral artery disease.**

The regression line was calculated using the inverse-variance weighted method.

Abbreviations: SNP = single nucleotide polymorphism. **A.** Associations between exposure and peripheral artery disease found using genome wide association study executed by the Million veteran program; **B.** Associations between exposure and peripheral artery disease found using the GoLEAD-SUMMIT Genome wide association study.

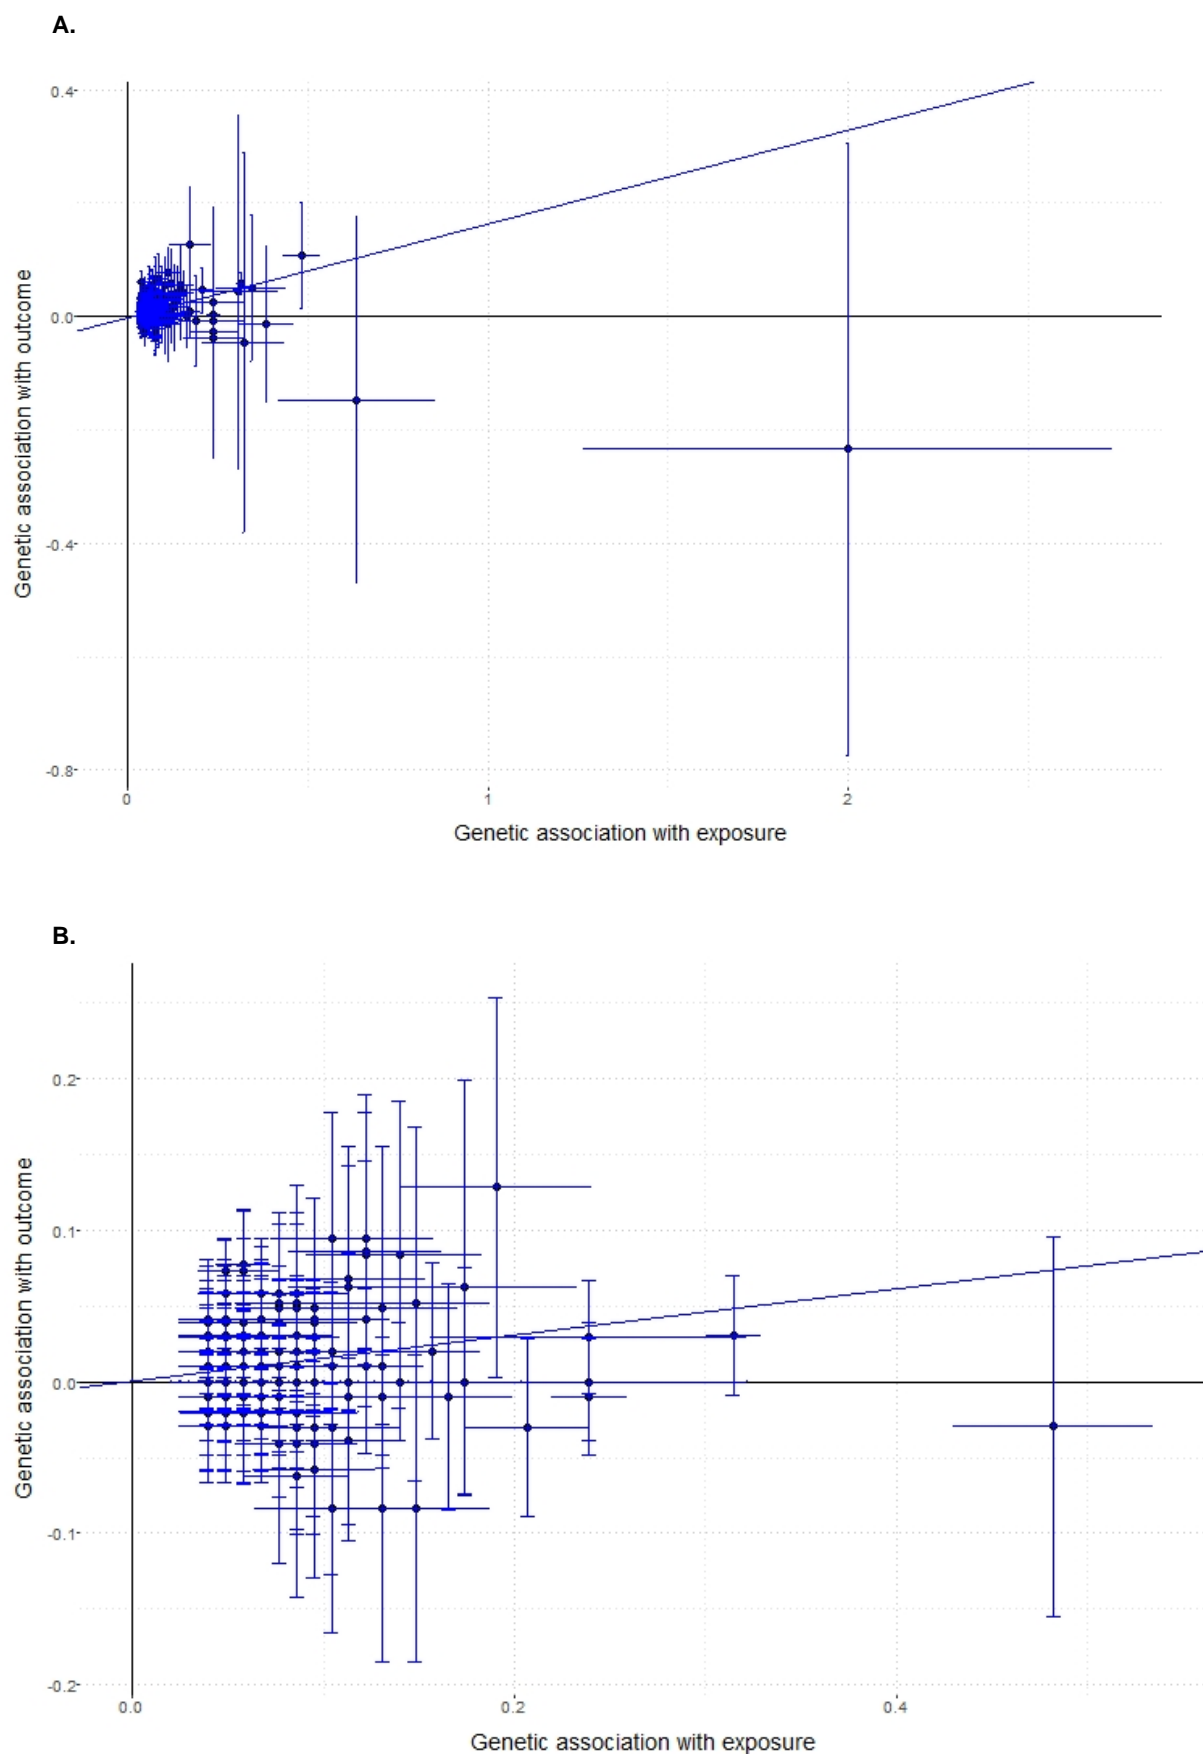

**Figure S6B. The association between the SNPs and 1 mmol/L change in glucose versus the association between the SNPs and peripheral artery disease.**

The regression line was calculated using the inverse-variance weighted method.

Abbreviations: SD = standard deviation; SNP = single nucleotide polymorphism **A.** Associations between exposure and peripheral artery disease found using genome wide association study executed by the Million veteran program; **B.** Associations between exposure and peripheral artery disease found using the GoLEAD-SUMMIT Genome wide association study.

**A.**

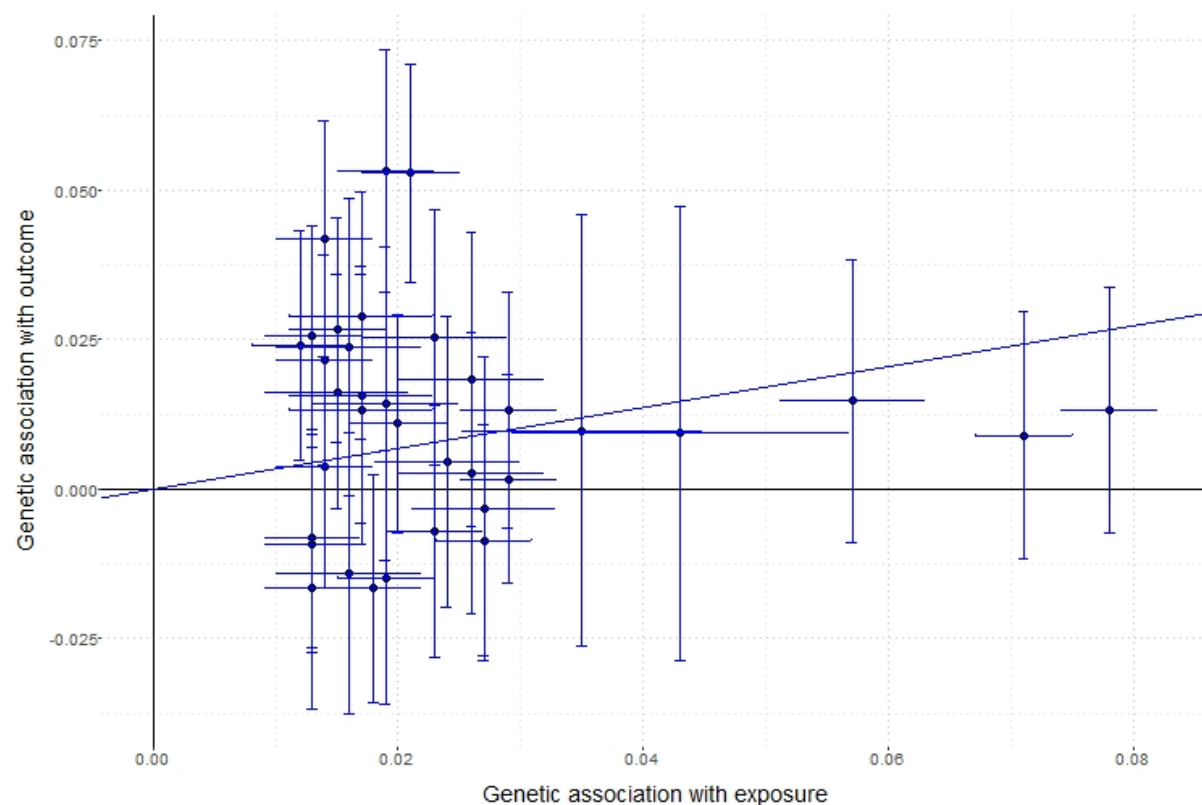

**B.**

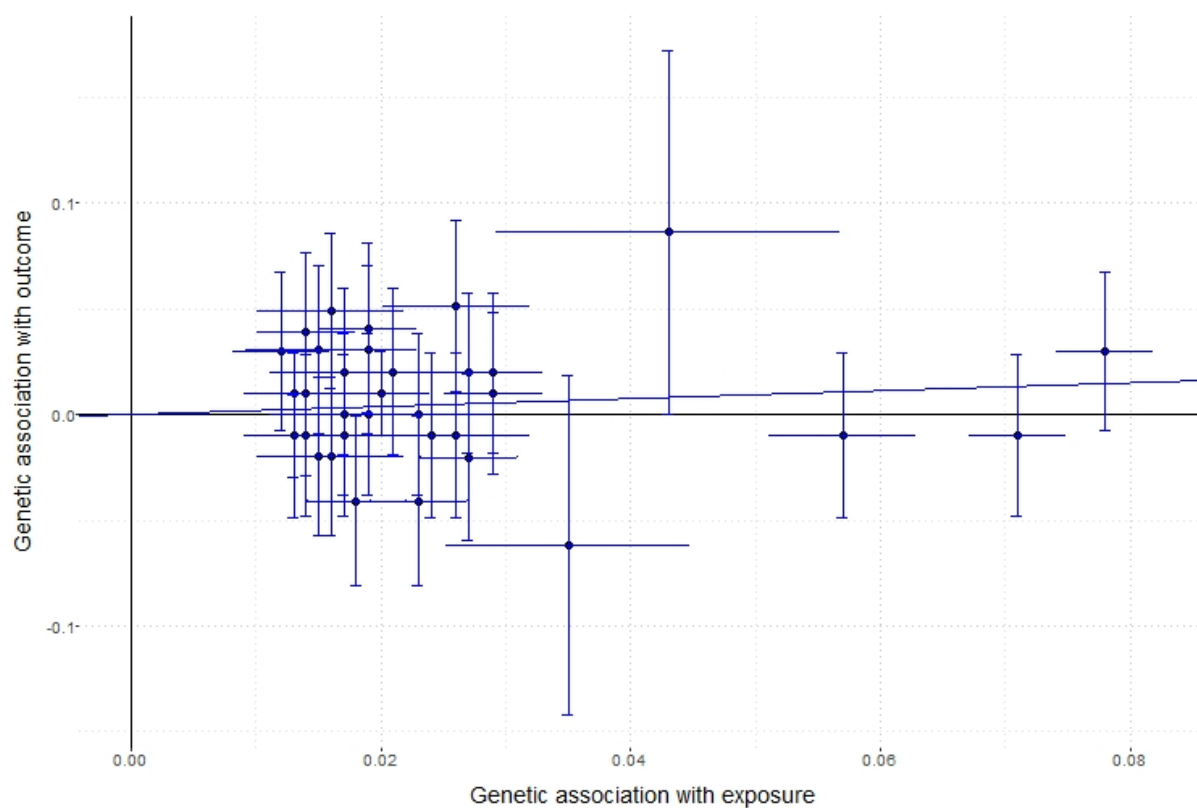

**Figure S6C. The association between the SNPs and 1 SD change in LDL-C versus the association between the SNPs and peripheral artery disease.**

The regression line was calculated using the inverse-variance weighted method.

Abbreviations: SNP = single nucleotide polymorphism **A.** Associations between exposure and peripheral artery disease found using genome wide association study executed by the Million veteran program; **B.** Associations between exposure and peripheral artery disease found using the GoLEAD-SUMMIT Genome wide association study.

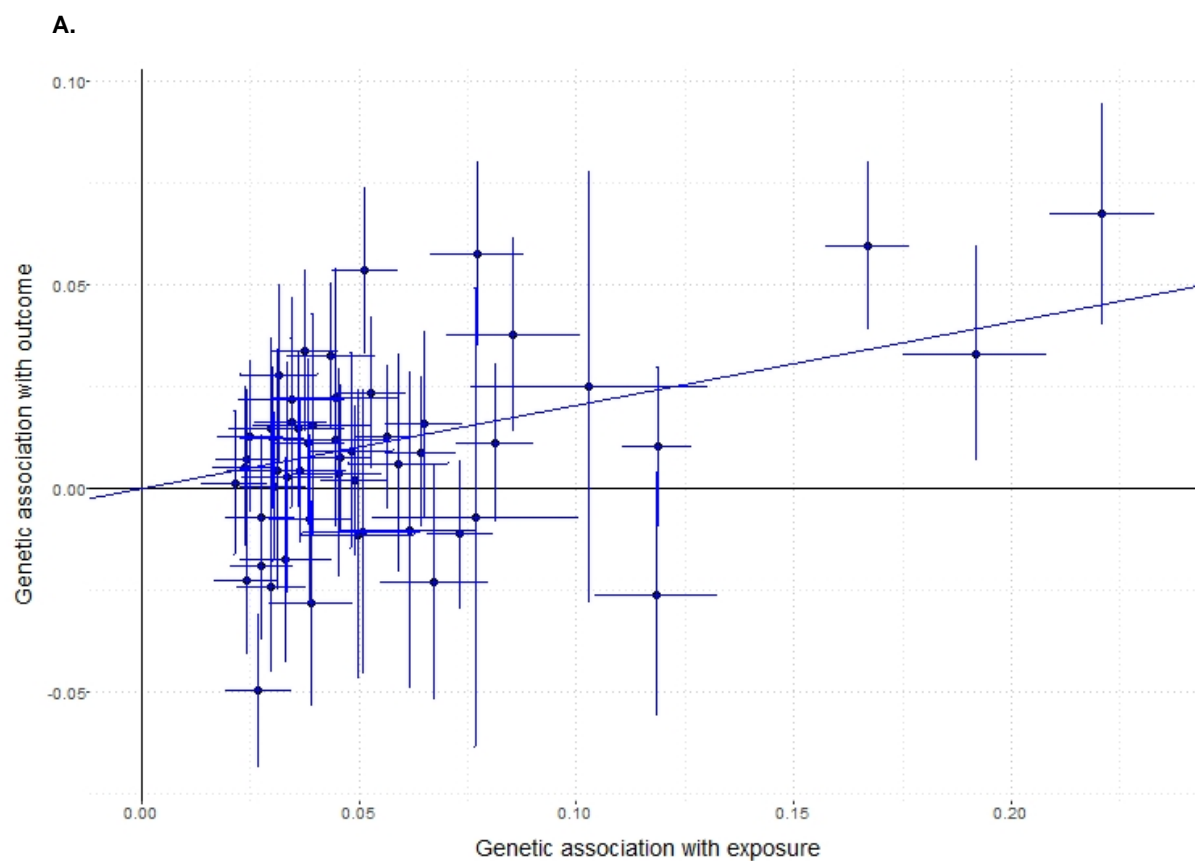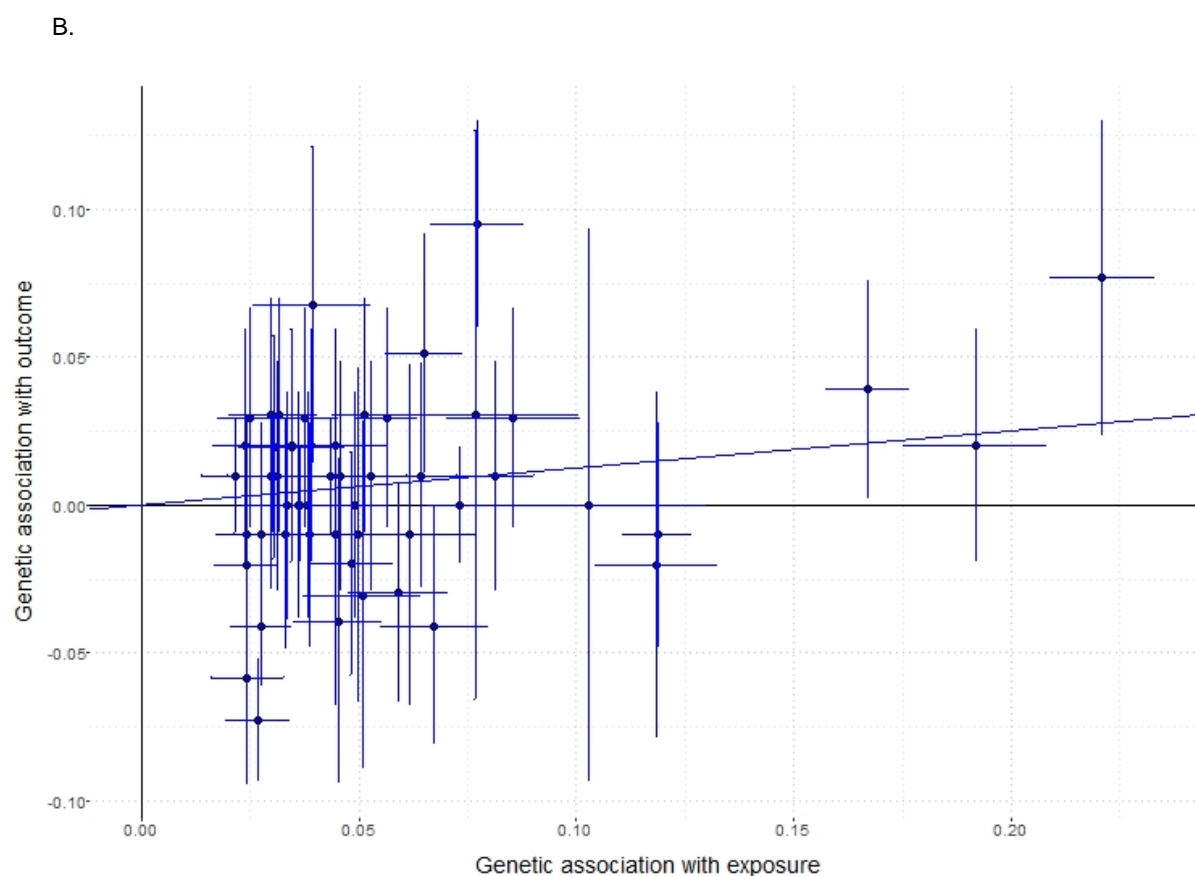

**Figure S6D. The association between the SNPs and 1 SD change in HDL cholesterol versus the association between the SNPs and peripheral artery disease.**

The regression line was calculated using the inverse-variance weighted method.

Abbreviations: SD = standard deviation; SNP = single nucleotide polymorphism. **A.** Associations between exposure and peripheral artery disease found using genome wide association study executed by the Million veteran program; **B.** Associations between exposure and peripheral artery disease found using the GoLEAD-SUMMIT Genome wide association study.

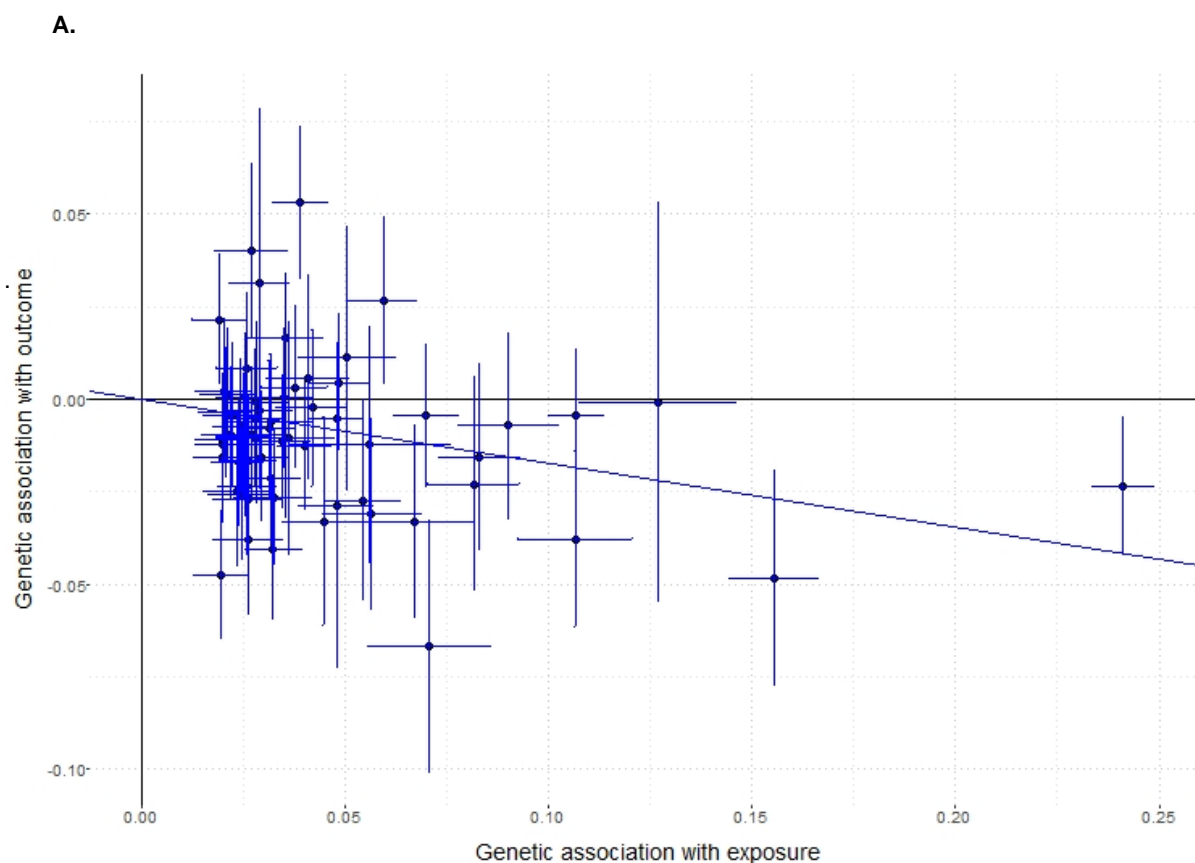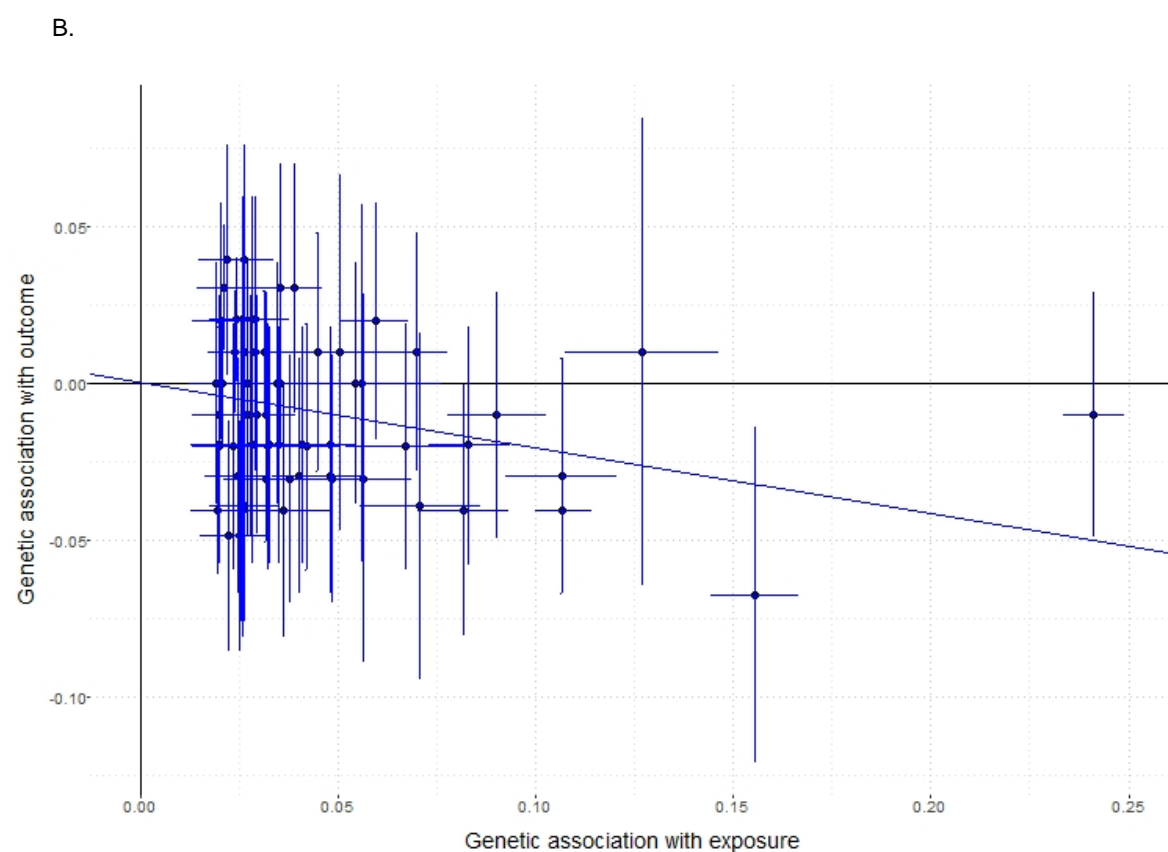

**Figure S6E. The association between the SNPs and 1 SD change in Triglyceride level versus the association between the SNPs and peripheral artery disease.**

The regression line was calculated using the inverse-variance weighted method.

Abbreviations: SNP = single nucleotide polymorphism . **A.** Associations between exposure and peripheral artery disease found using genome wide association study executed by the Million veteran program; **B.** Associations between exposure and peripheral artery disease found using the GoLEAD-SUMMIT Genome wide association study.

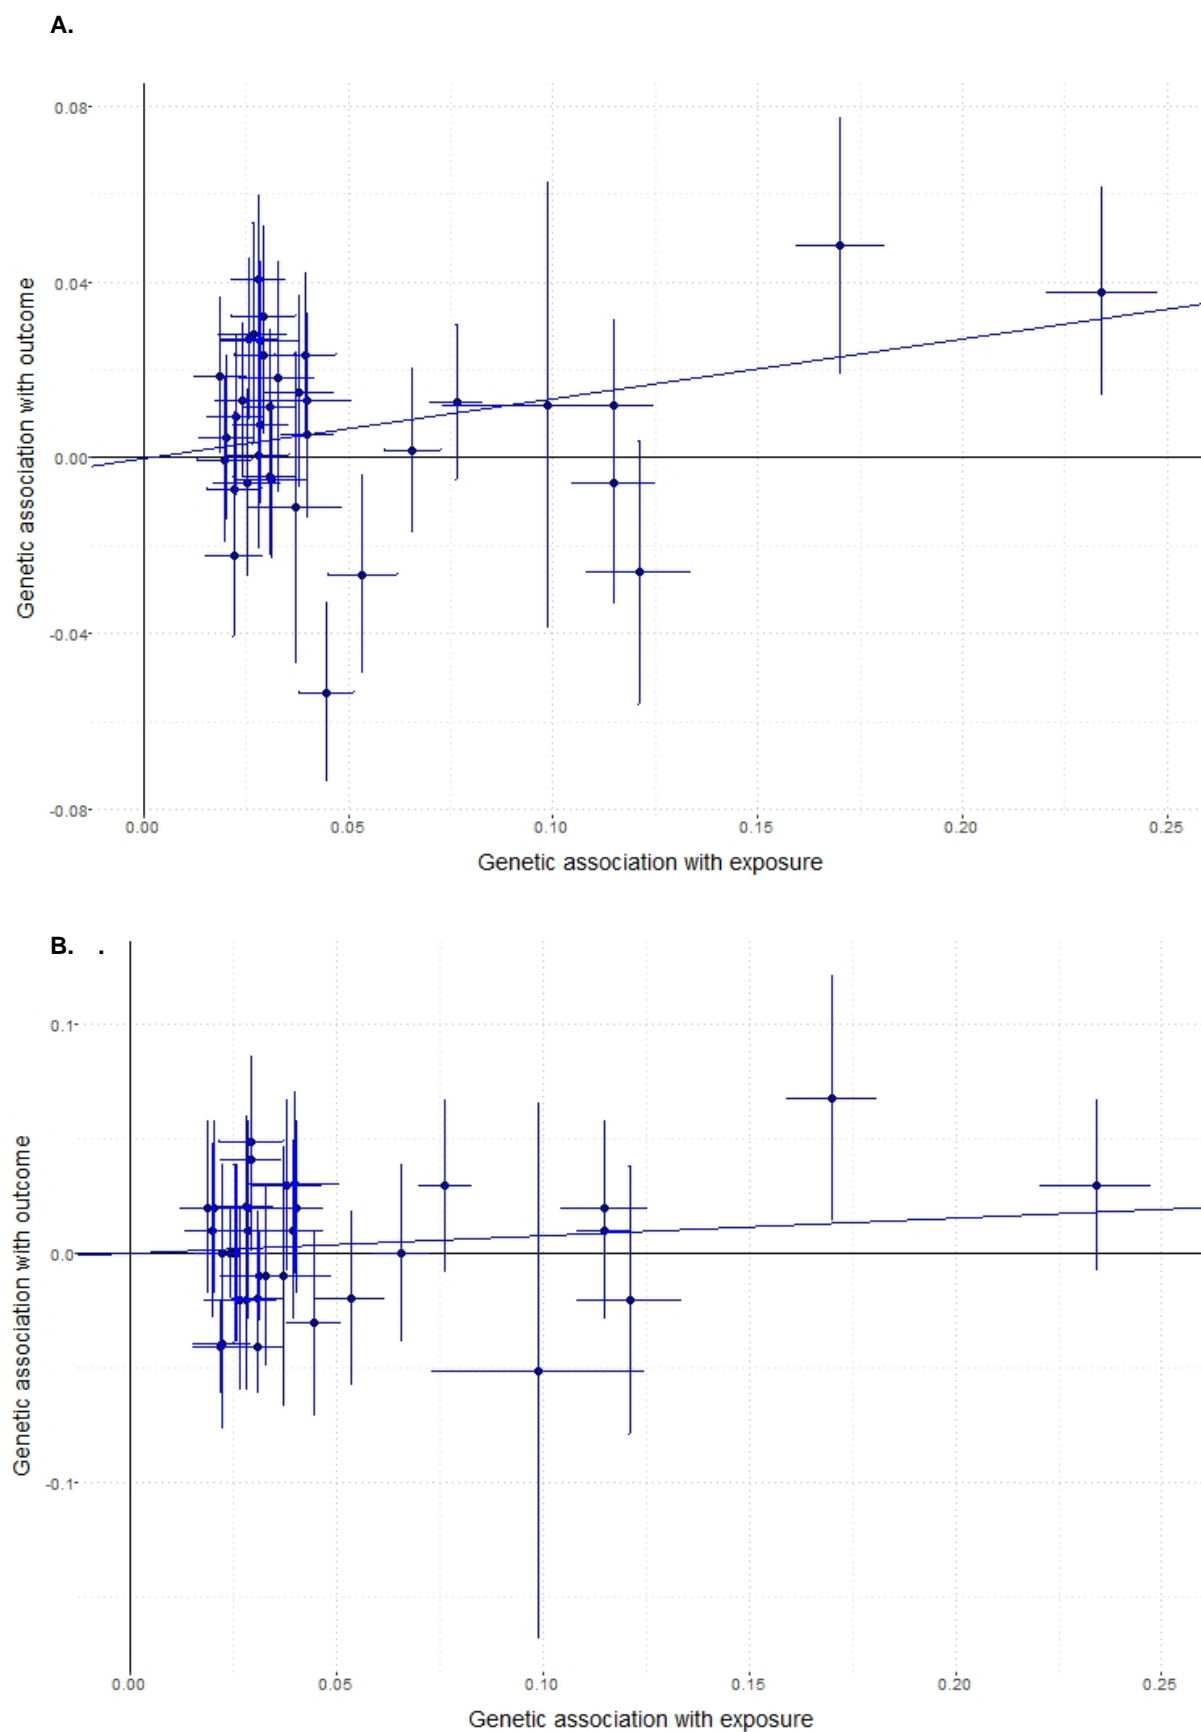

**Figure S6F. The association between the SNPs and smoking initiation versus the association between the SNPs and peripheral artery disease.**

The regression line was calculated using the inverse-variance weighted method.

Abbreviations: SNP = single nucleotide polymorphism. **A.** Associations between exposure and peripheral artery disease found using genome wide association study executed by the Million veteran program; **B.** Associations between exposure and peripheral artery disease found using the GoLEAD-SUMMIT Genome wide association study.

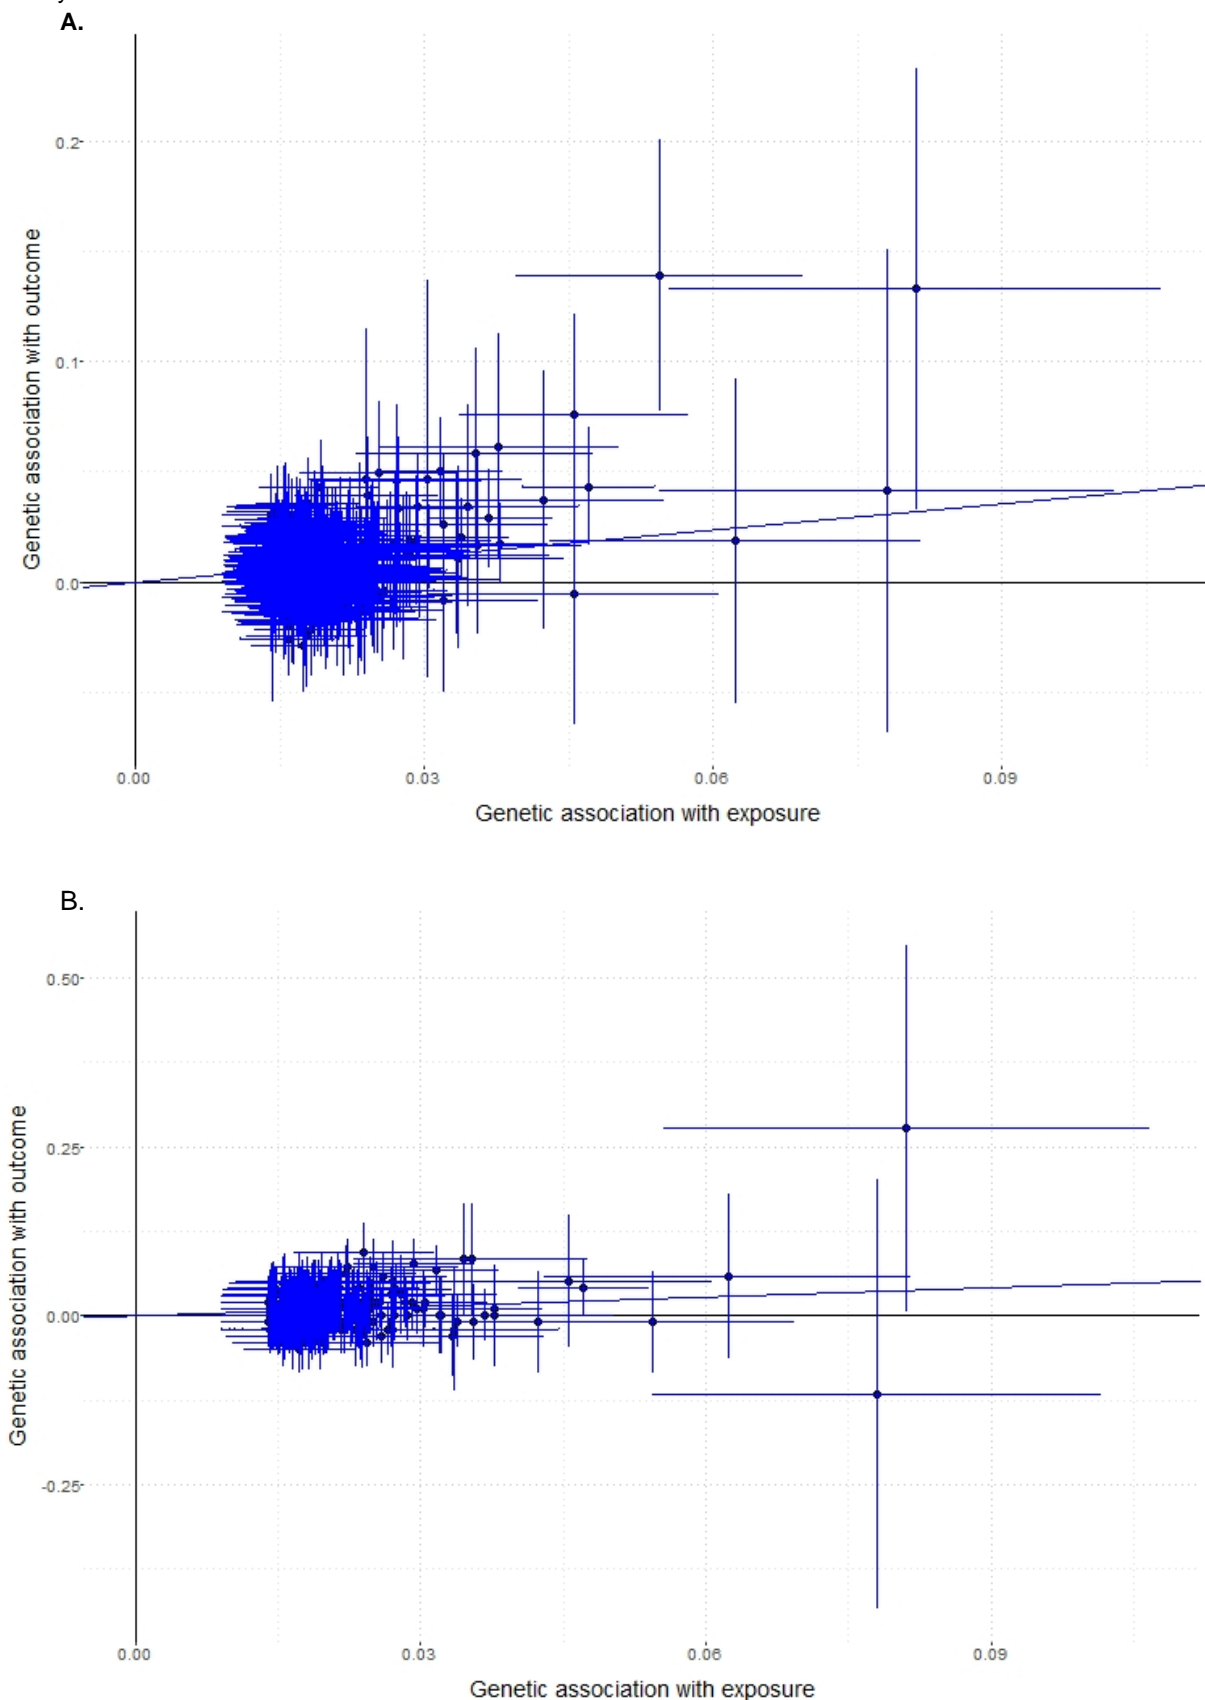

**Figure S6G. The association between the SNPs and smoking cessation versus the association between the SNPs and peripheral artery disease.**

The regression line was calculated using the inverse-variance weighted method.

Abbreviations: SNP = single nucleotide polymorphism. **A.** Associations between exposure and peripheral artery disease found using genome wide association study executed by the Million veteran program; **B.** Associations between exposure and peripheral artery disease found using the GoLEAD-SUMMIT Genome wide association study.

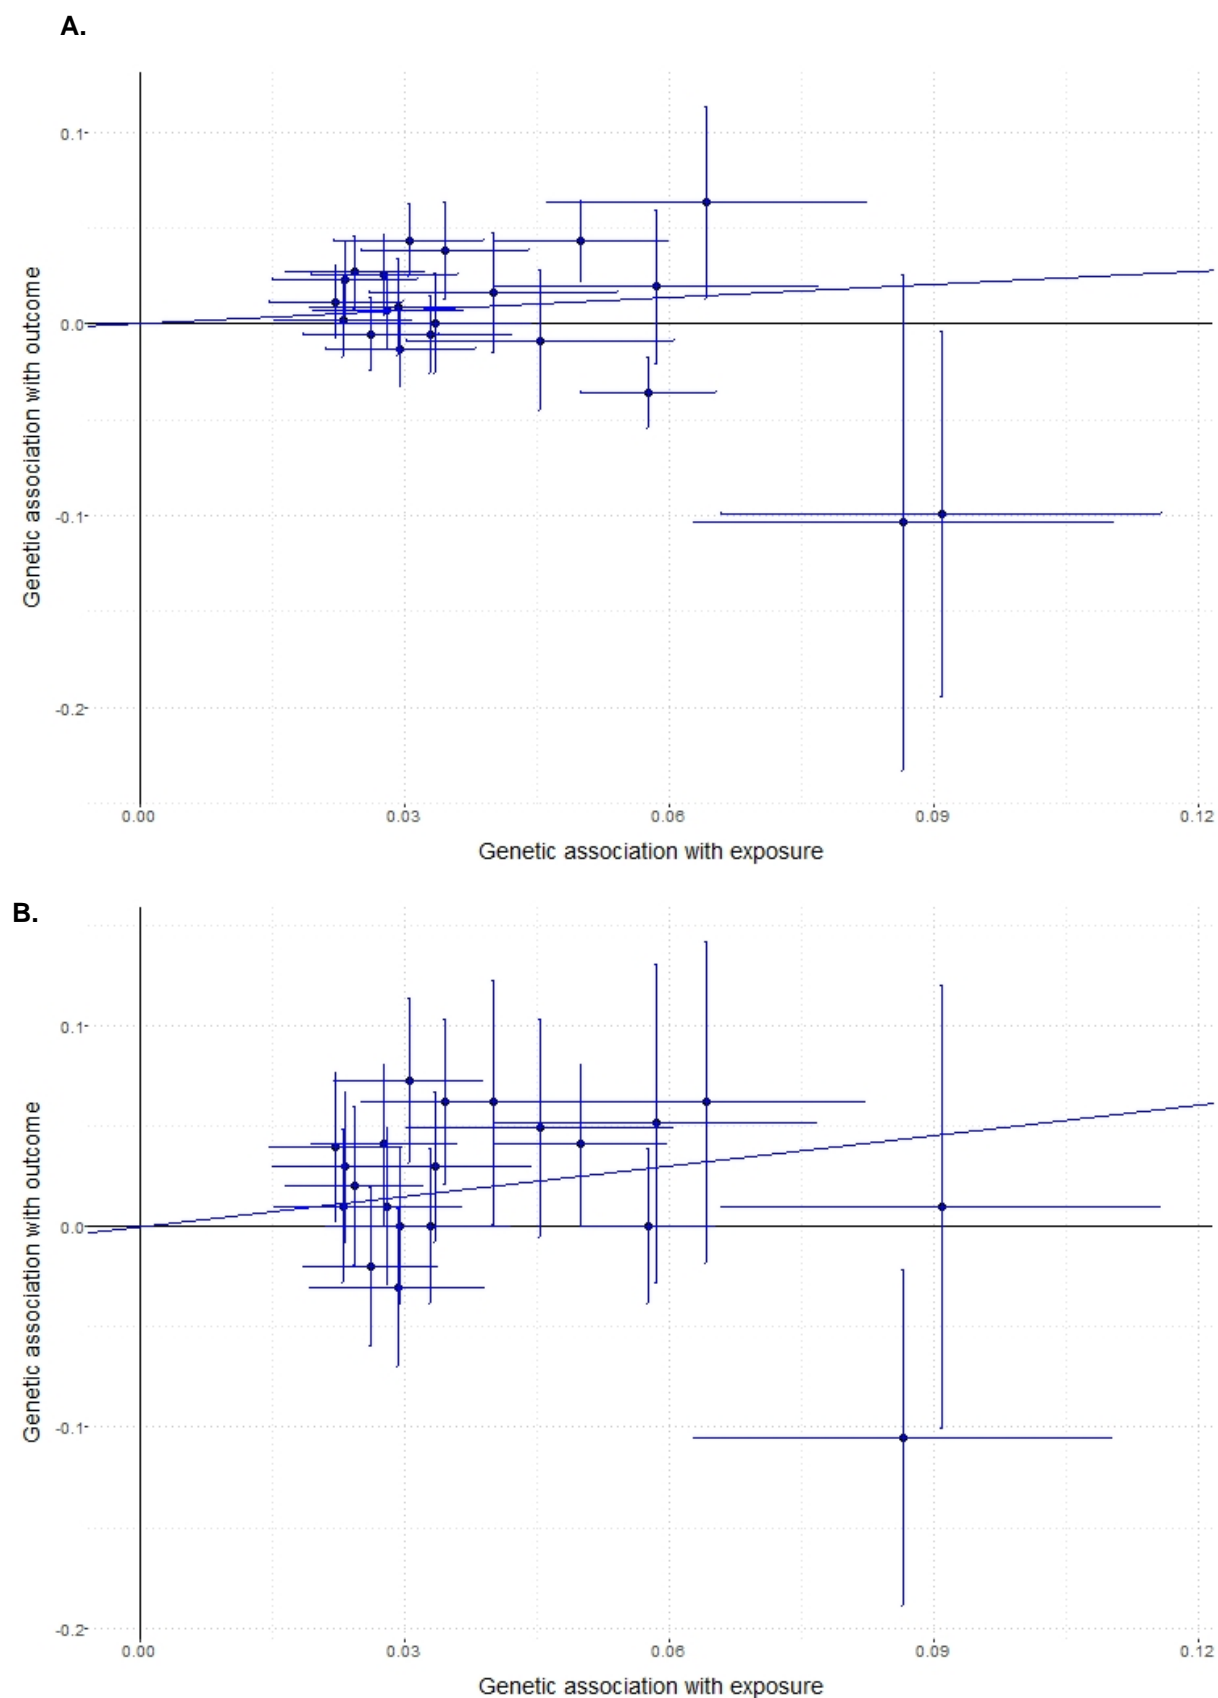

**Figure S6H. The association between the SNPs and smoking heaviness versus the association between the SNPs and peripheral artery disease.**

The regression line was calculated using the inverse-variance weighted method.

Abbreviations: SNP = single nucleotide polymorphism. **A.** Associations between exposure and peripheral artery disease found using genome wide association study executed by the Million veteran program; **B.** Associations between exposure and peripheral artery disease found using the GoLEAD-SUMMIT Genome wide association study.

**A.**

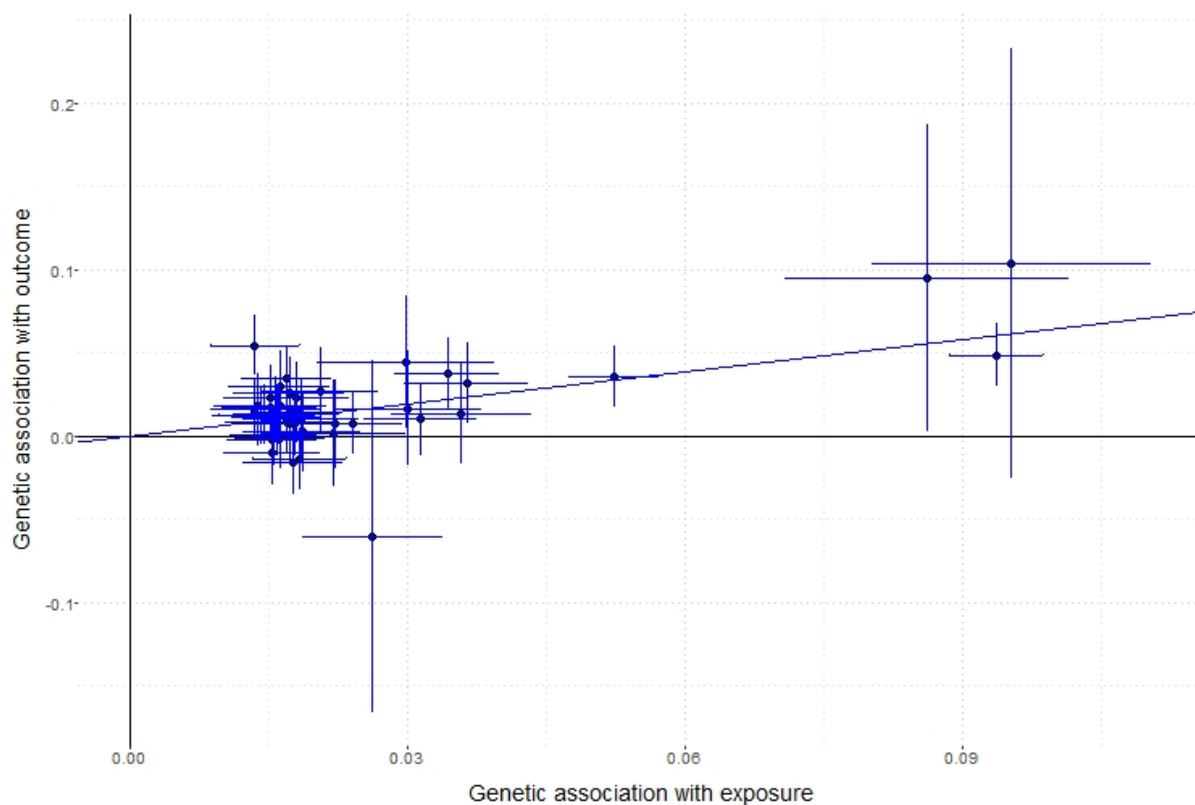

**B.**

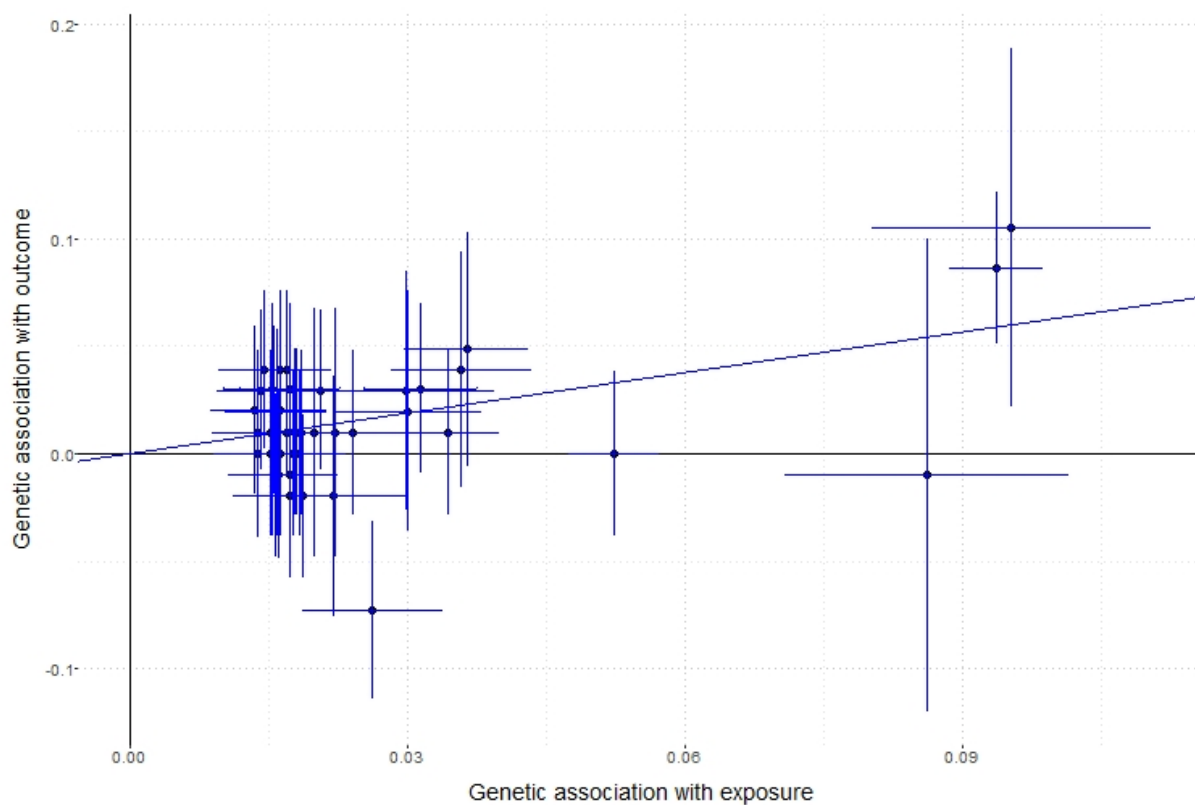

**Figure S6I. The association between the SNPs and alcohol consumption versus the association between the SNPs and peripheral artery disease.**

The regression line was calculated using the inverse-variance weighted method.

Abbreviations: SNP = single nucleotide polymorphism. **A.** Associations between exposure and peripheral artery disease found using genome wide association study executed by the Million veteran program; **B.** Associations between exposure and peripheral artery disease found using the GoLEAD-SUMMIT Genome wide association study.

**A.**

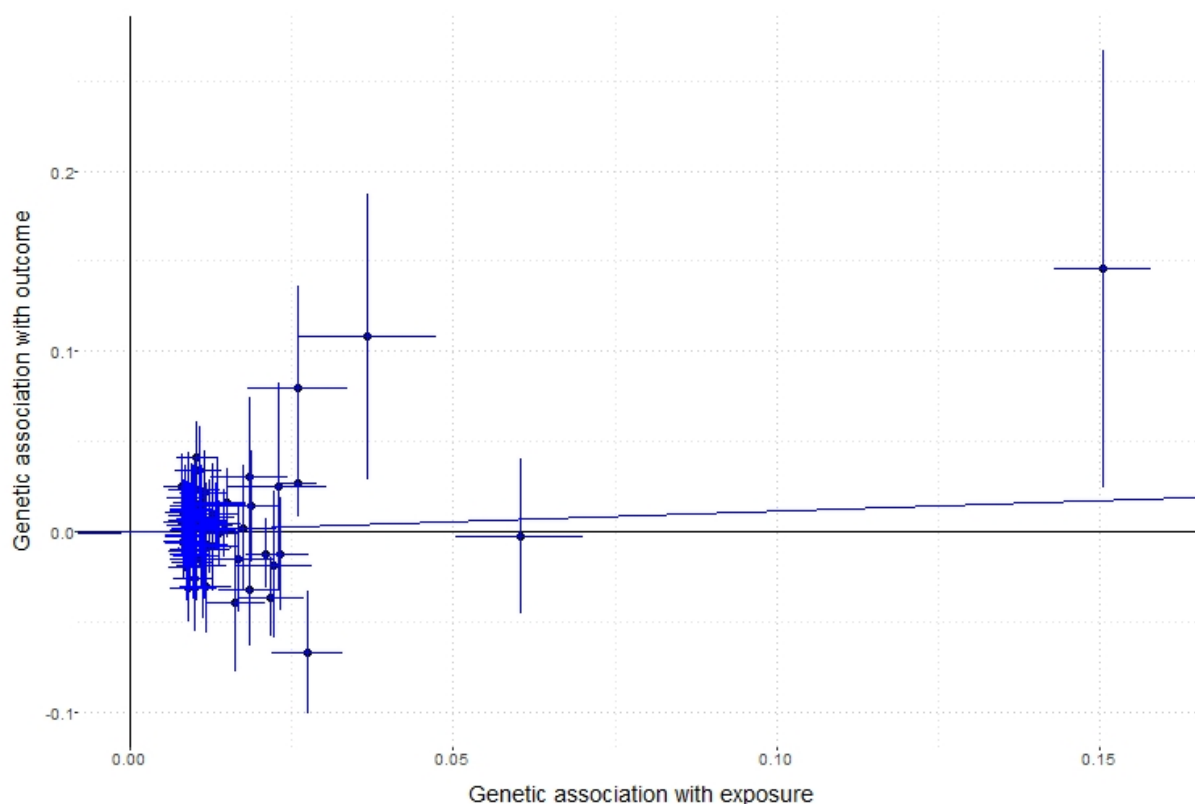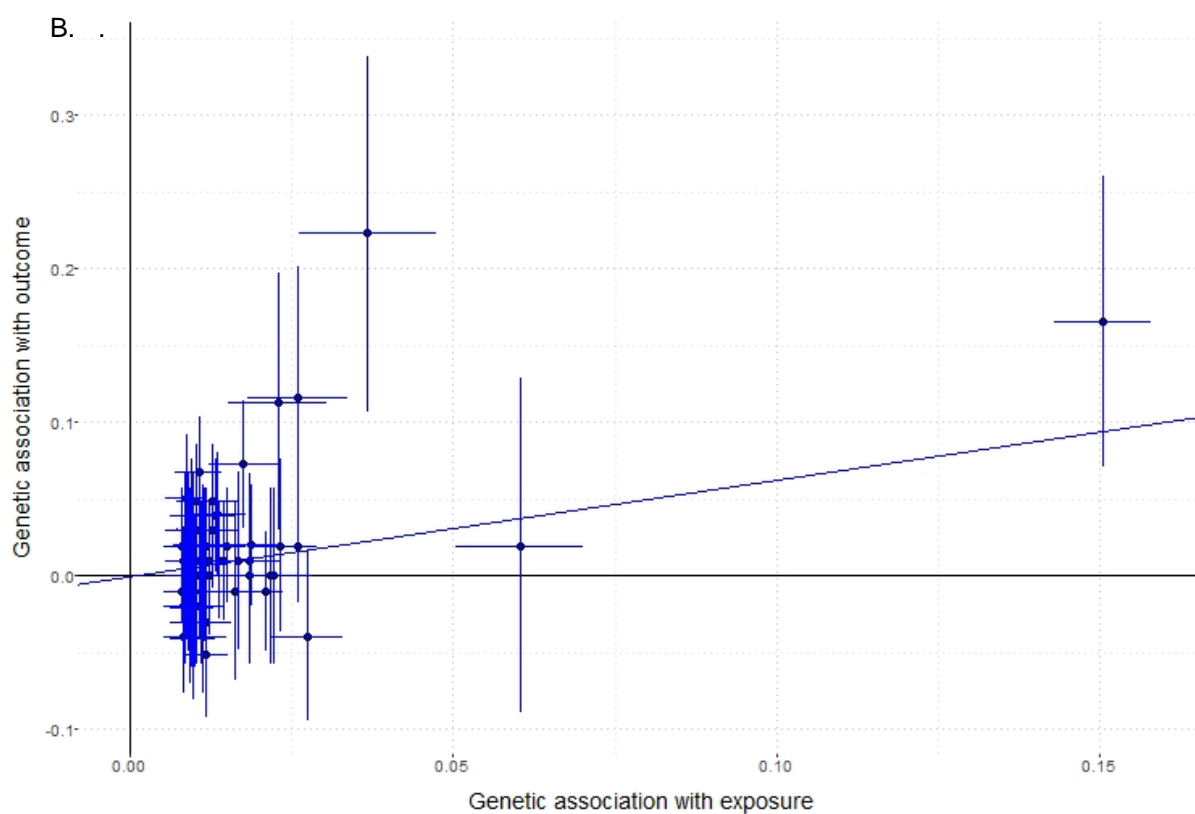

**Figure S6J. The association between the SNPs and coffee consumption versus the association between the SNPs and peripheral artery disease.**

The regression line was calculated using the inverse-variance weighted method.

Abbreviations: SNP = single nucleotide polymorphism. **A.** Associations between exposure and peripheral artery disease found using genome wide association study executed by the Million veteran program; **B.** Associations between exposure and peripheral artery disease found using the GoLEAD-SUMMIT Genome wide association study.

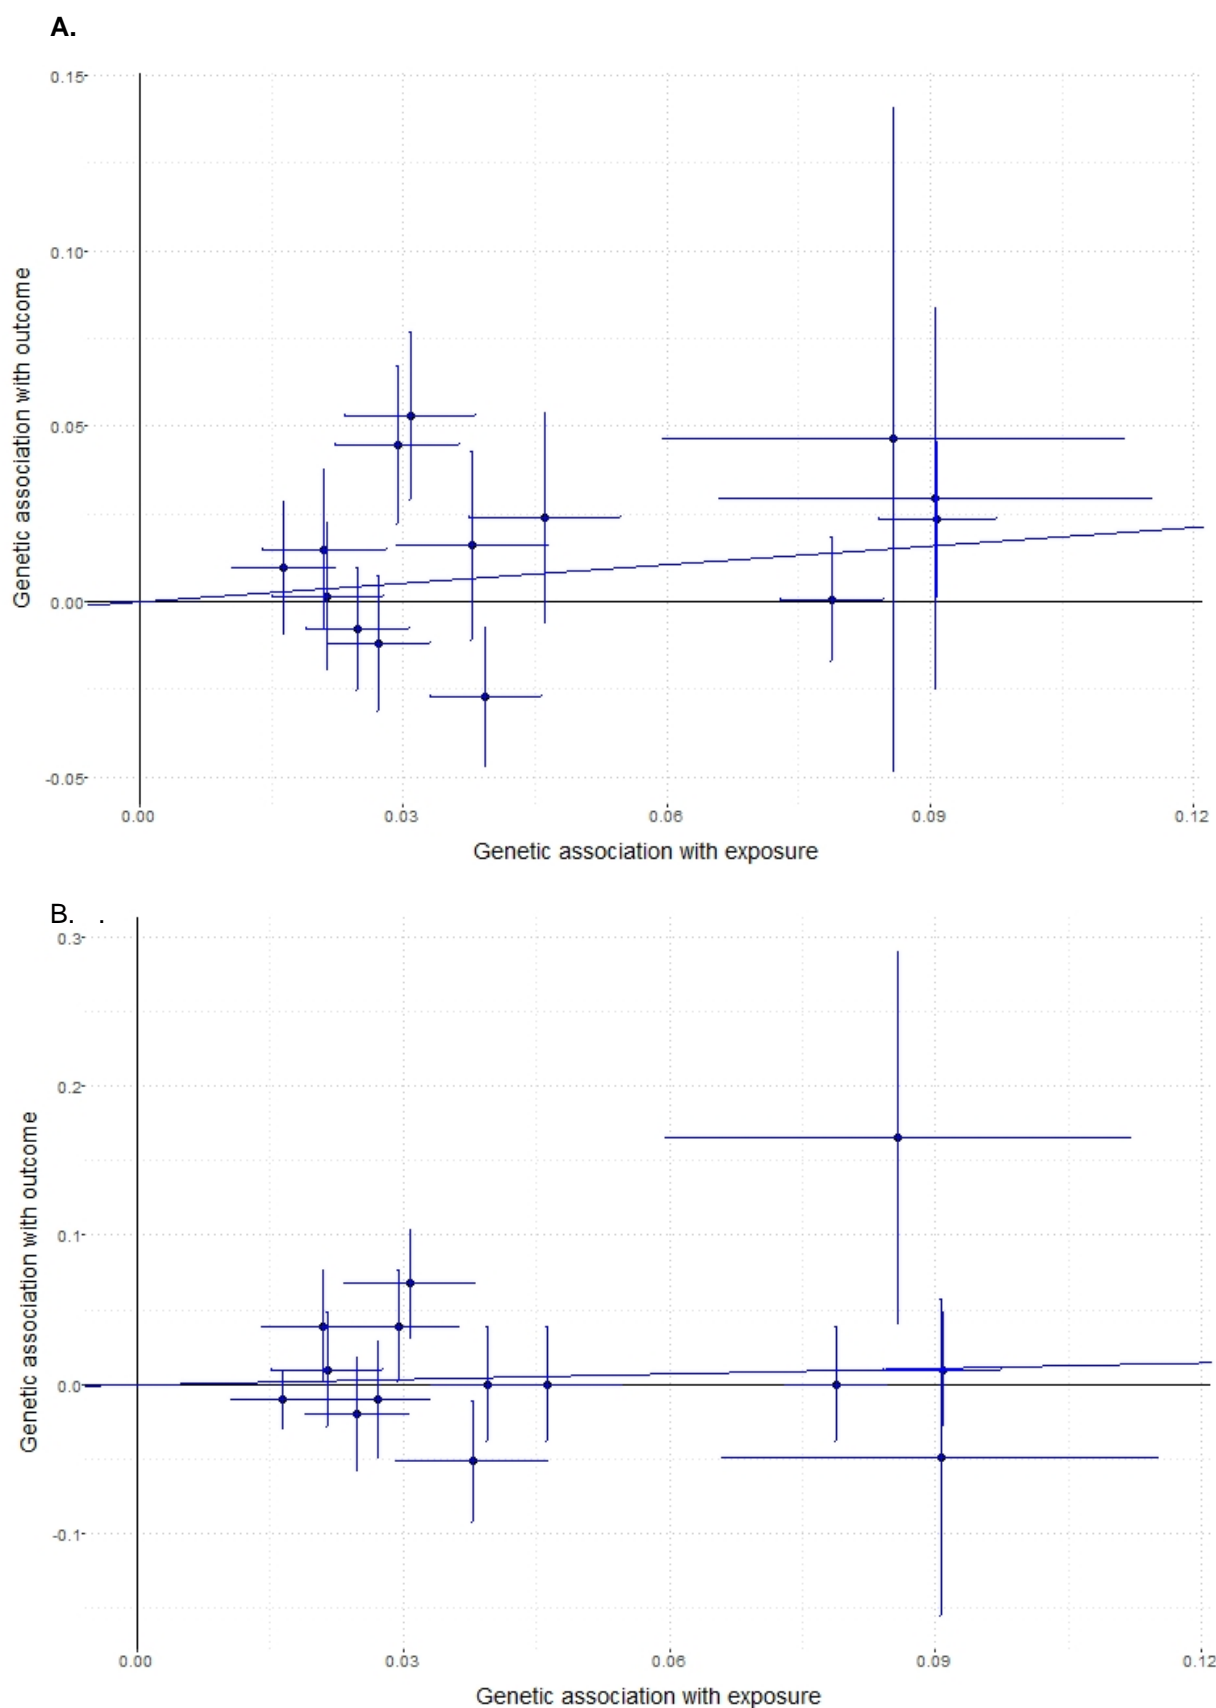

**Figure S6K. The association between the SNPs and Moderate to vigorous physical activity versus the association between the SNPs and peripheral artery disease.**

The regression line was calculated using the inverse-variance weighted method.

Abbreviations: SNP = single nucleotide polymorphism. **A.** Associations between exposure and peripheral artery disease found using genome wide association study executed by the Million veteran program; **B.** Associations between exposure and peripheral artery disease found using the GoLEAD-SUMMIT Genome wide association study.

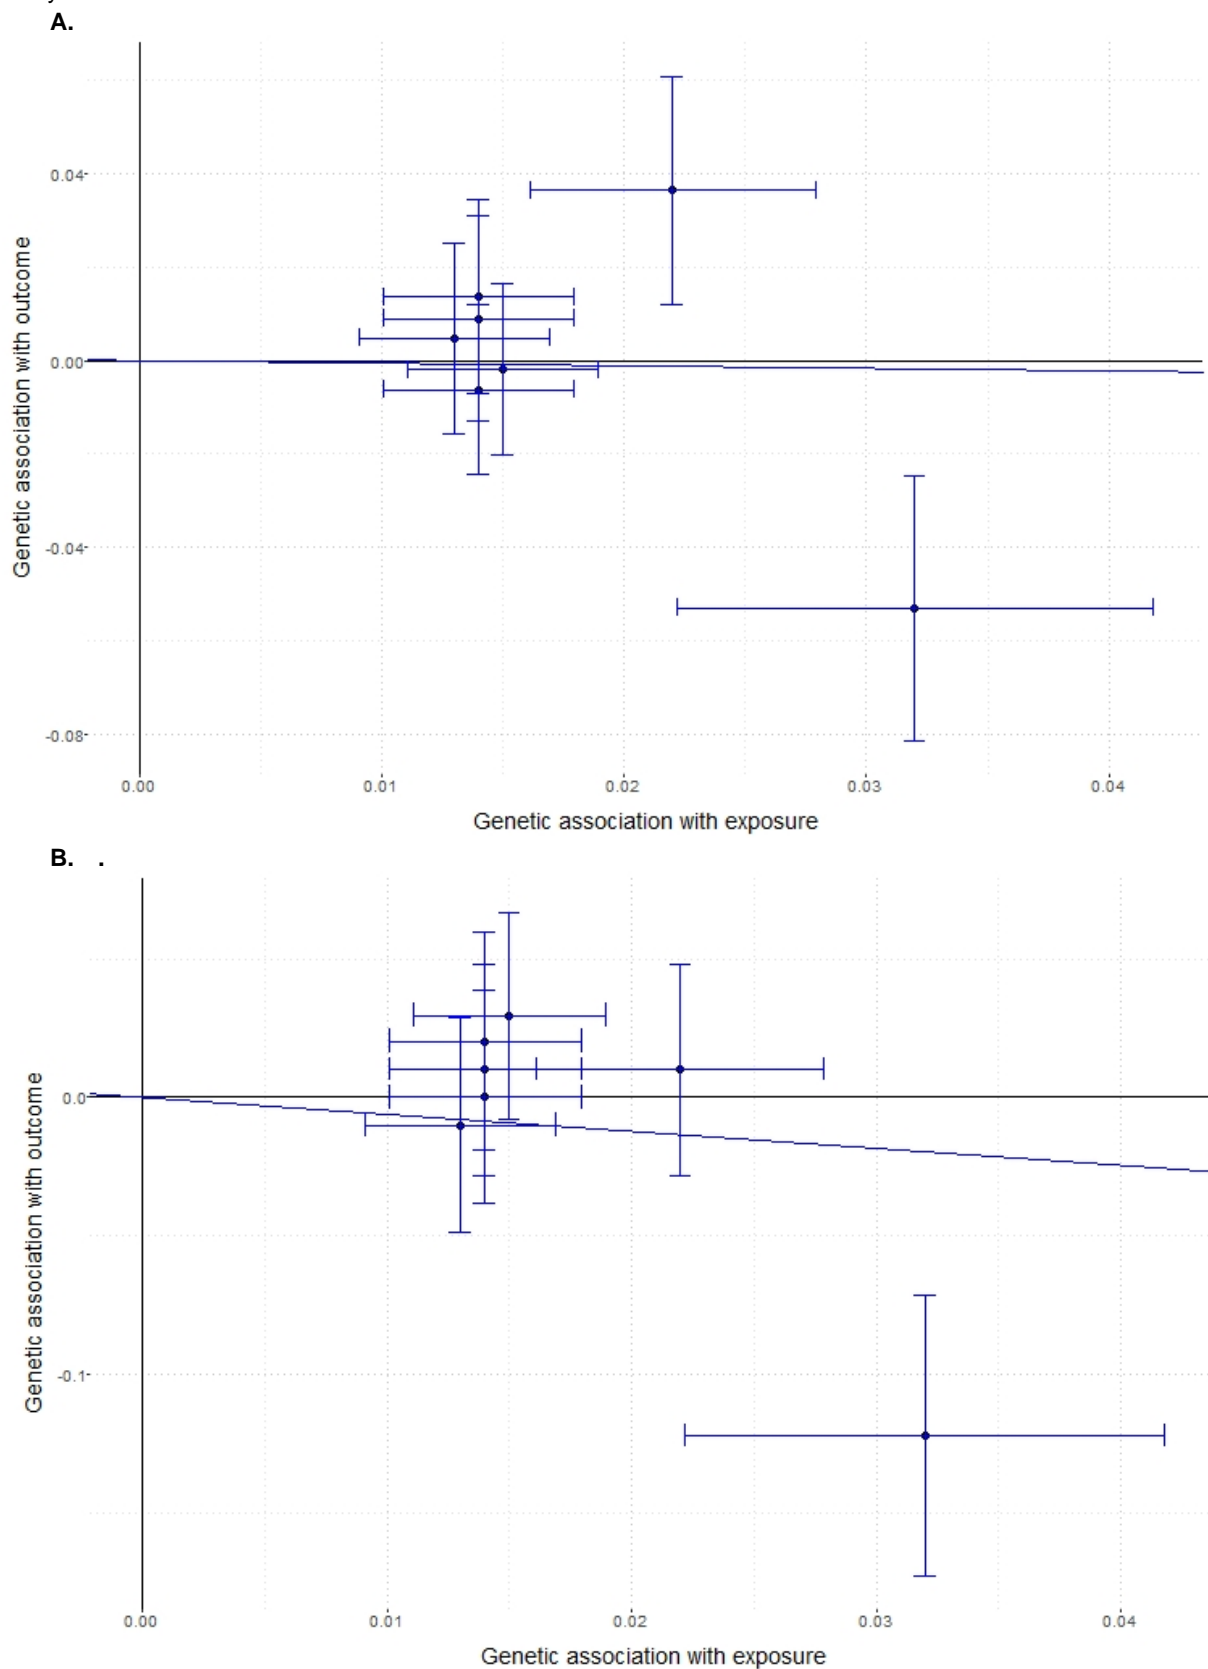

**Figure S6L. The association between the SNPs and sedentary behavior versus the association between the SNPs and peripheral artery disease.**

The regression line was calculated using the inverse-variance weighted method.

Abbreviations: SNP = single nucleotide polymorphism. **A.** Associations between exposure and peripheral artery disease found using genome wide association study executed by the Million veteran program; **B.** Associations between exposure and peripheral artery disease found using the GoLEAD-SUMMIT Genome wide association study.

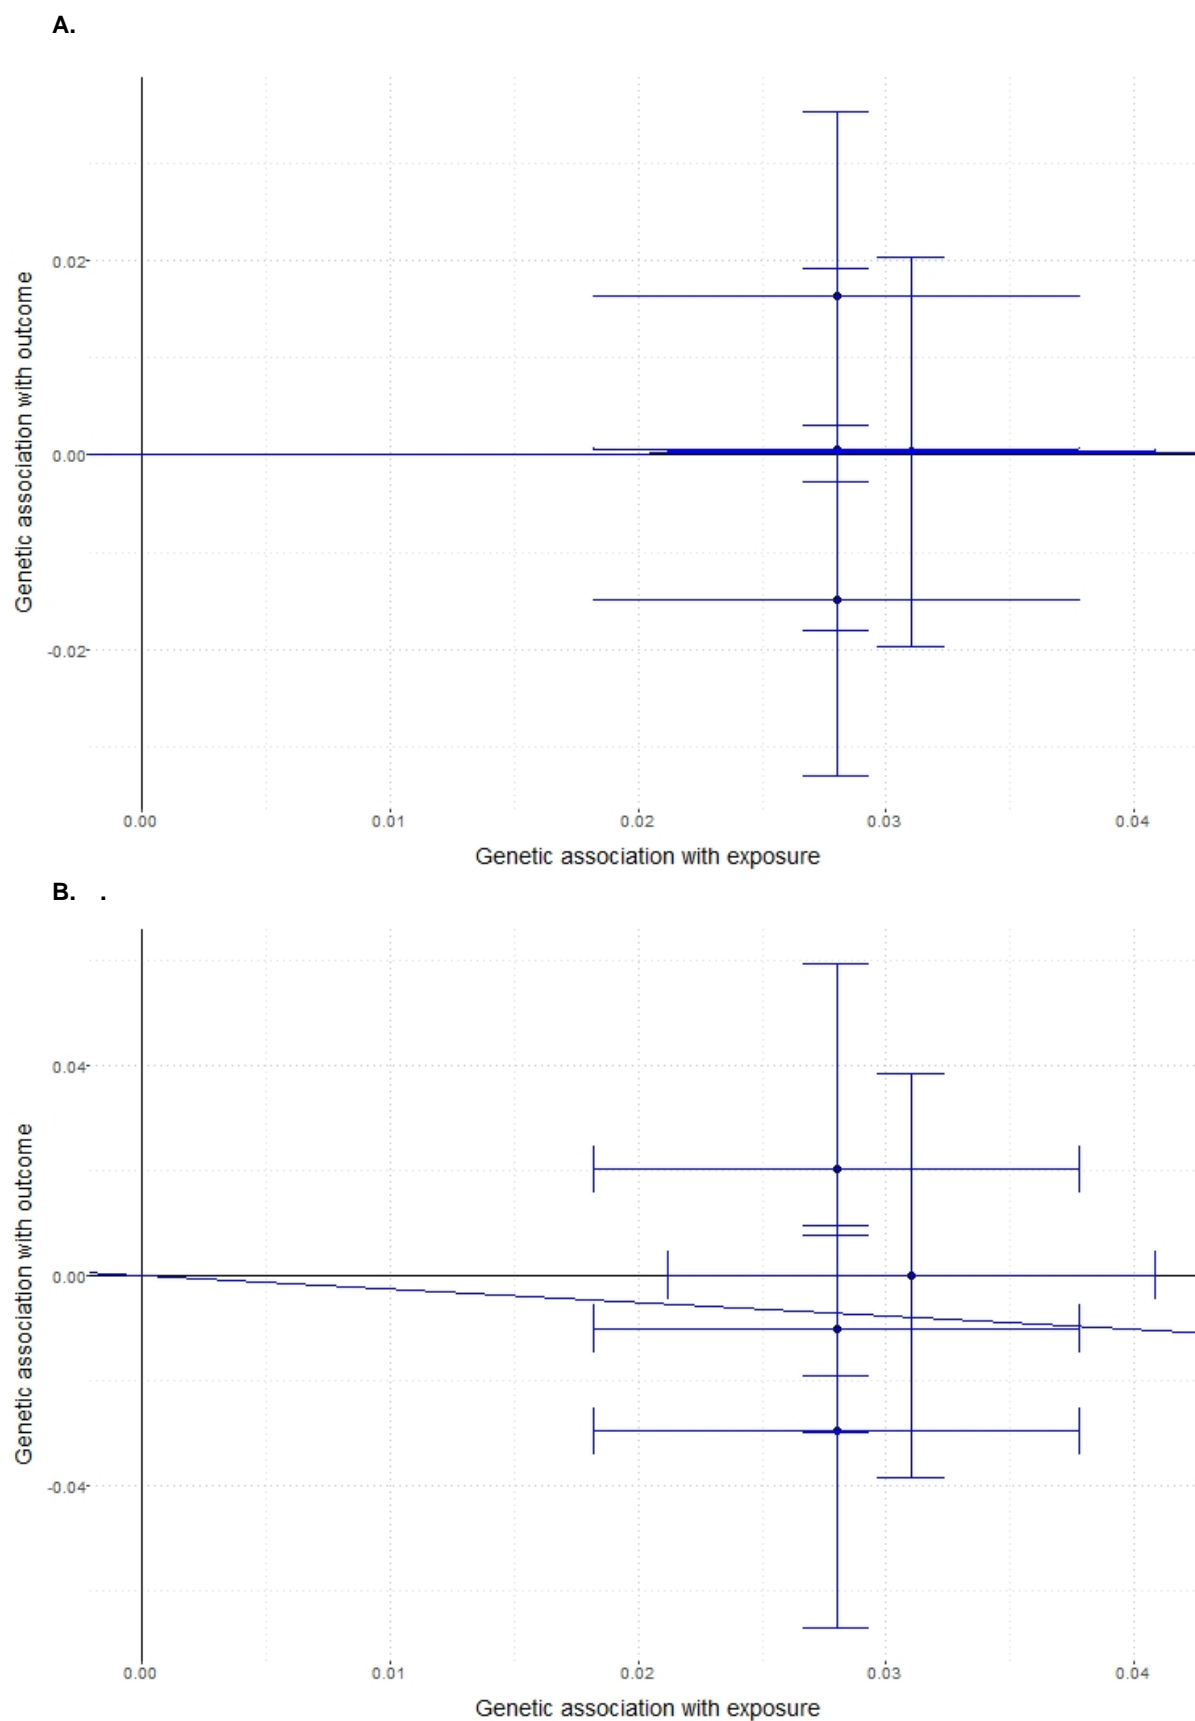

**Figure S6M. The association between the SNPs and insomnia versus the association between the SNPs and peripheral artery disease.**

The regression line was calculated using the inverse-variance weighted method.

Abbreviations: SNP = single nucleotide polymorphism. **A.** Associations between exposure and peripheral artery disease found using genome wide association study executed by the Million veteran program; **B.** Associations between exposure and peripheral artery disease found using the GoLEAD-SUMMIT Genome wide association study.

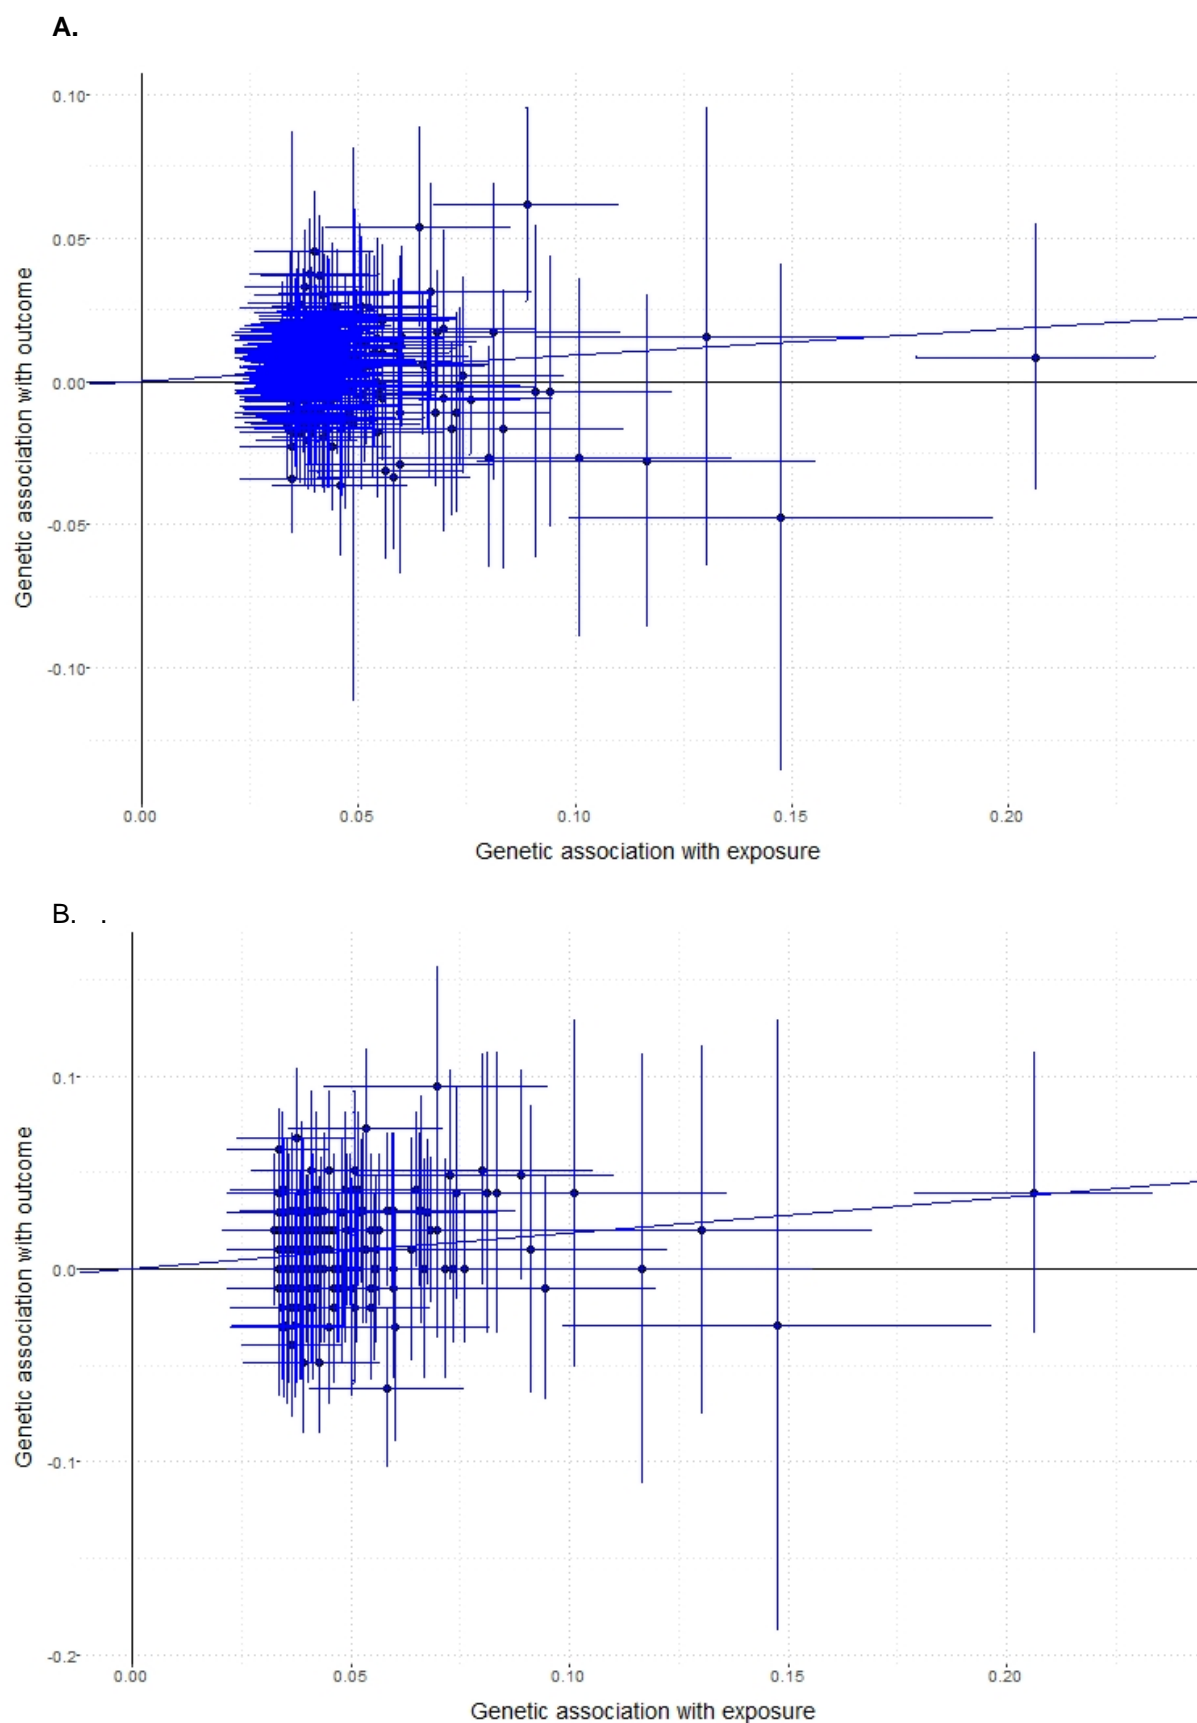

**Figure S6N. The association between the SNPs and sleep duration versus the association between the SNPs and peripheral artery disease.**

The regression line was calculated using the inverse-variance weighted method.

Abbreviations: SNP = single nucleotide polymorphism. **A.** Associations between exposure and peripheral artery disease found using genome wide association study executed by the Million veteran program; **B.** Associations between exposure and peripheral artery disease found using the GoLEAD-SUMMIT Genome wide association study.

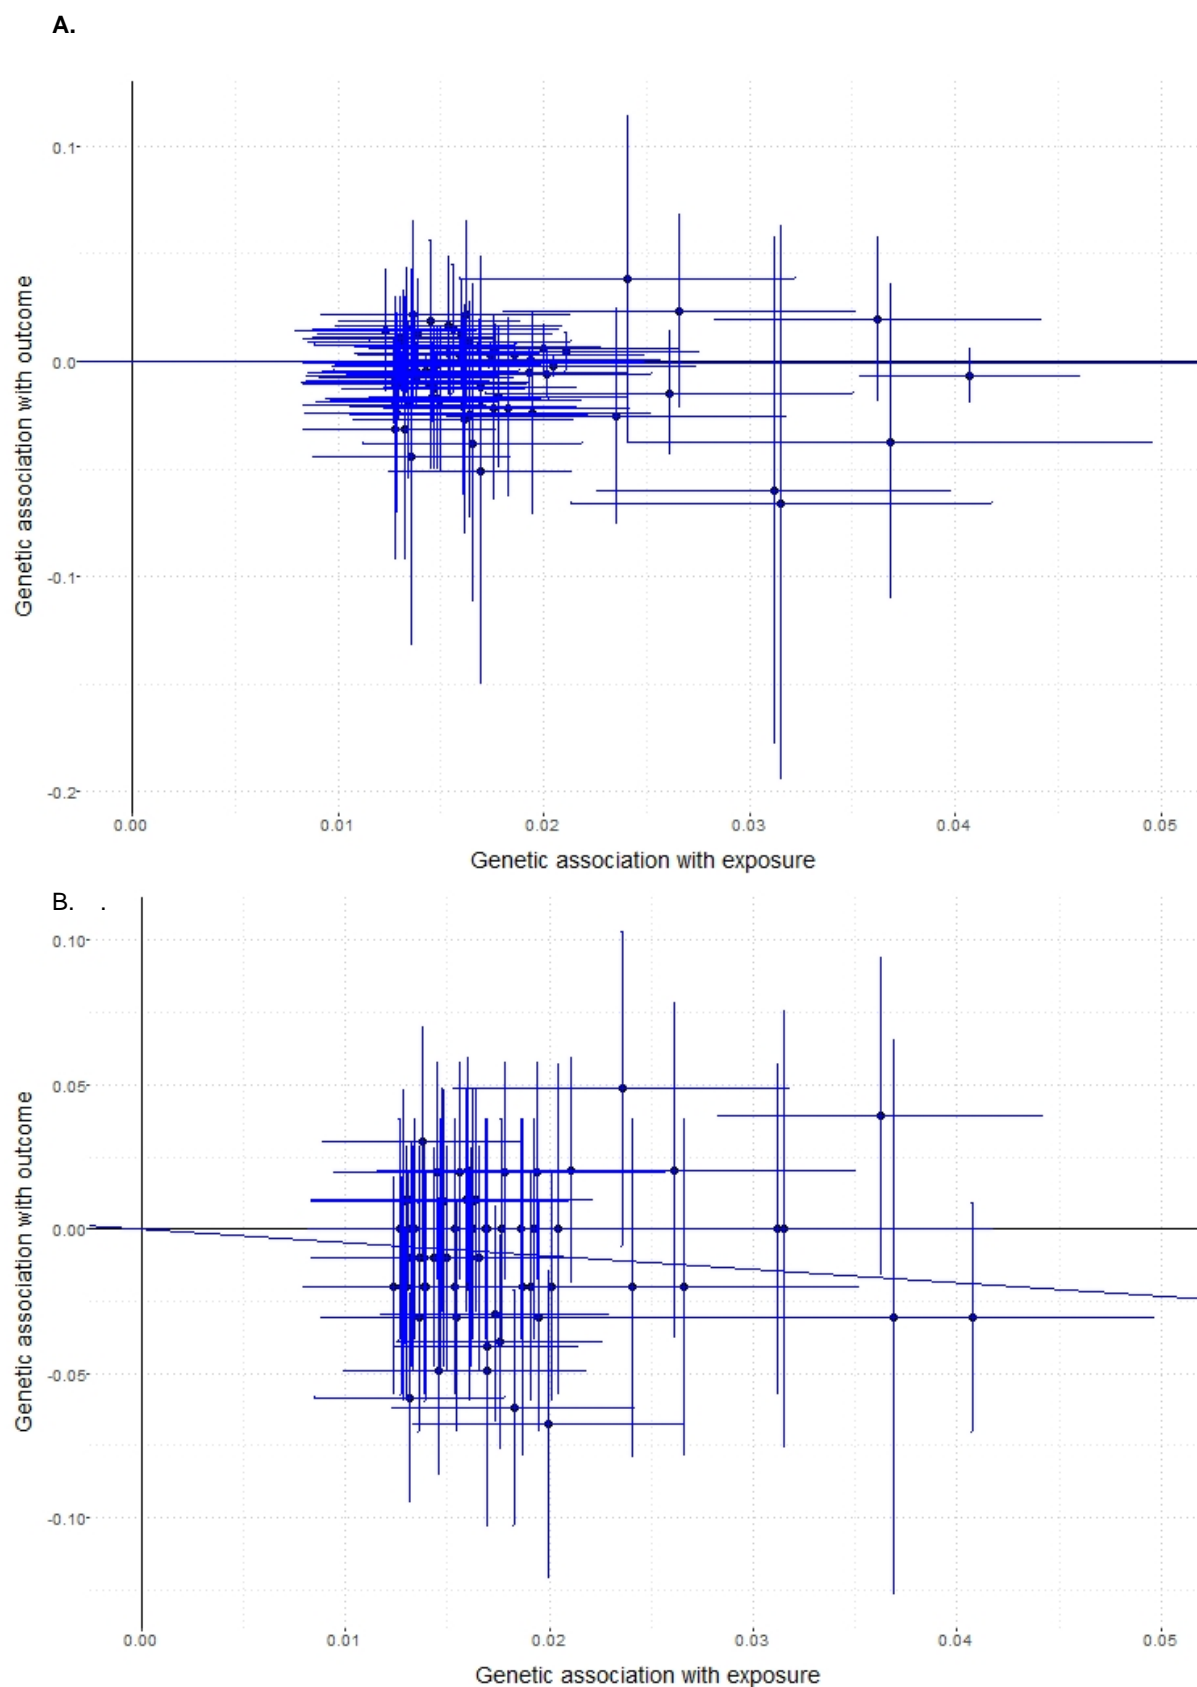

**Figure S60. The association between the SNPs and short sleep duration versus the association between the SNPs and peripheral artery disease.**

The regression line was calculated using the inverse-variance weighted method.

Abbreviations: SNP = single nucleotide polymorphism. **A.** Associations between exposure and peripheral artery disease found using genome wide association study executed by the Million veteran program; **B.** Associations between exposure and peripheral artery disease found using the GoLEAD-SUMMIT Genome wide association study.

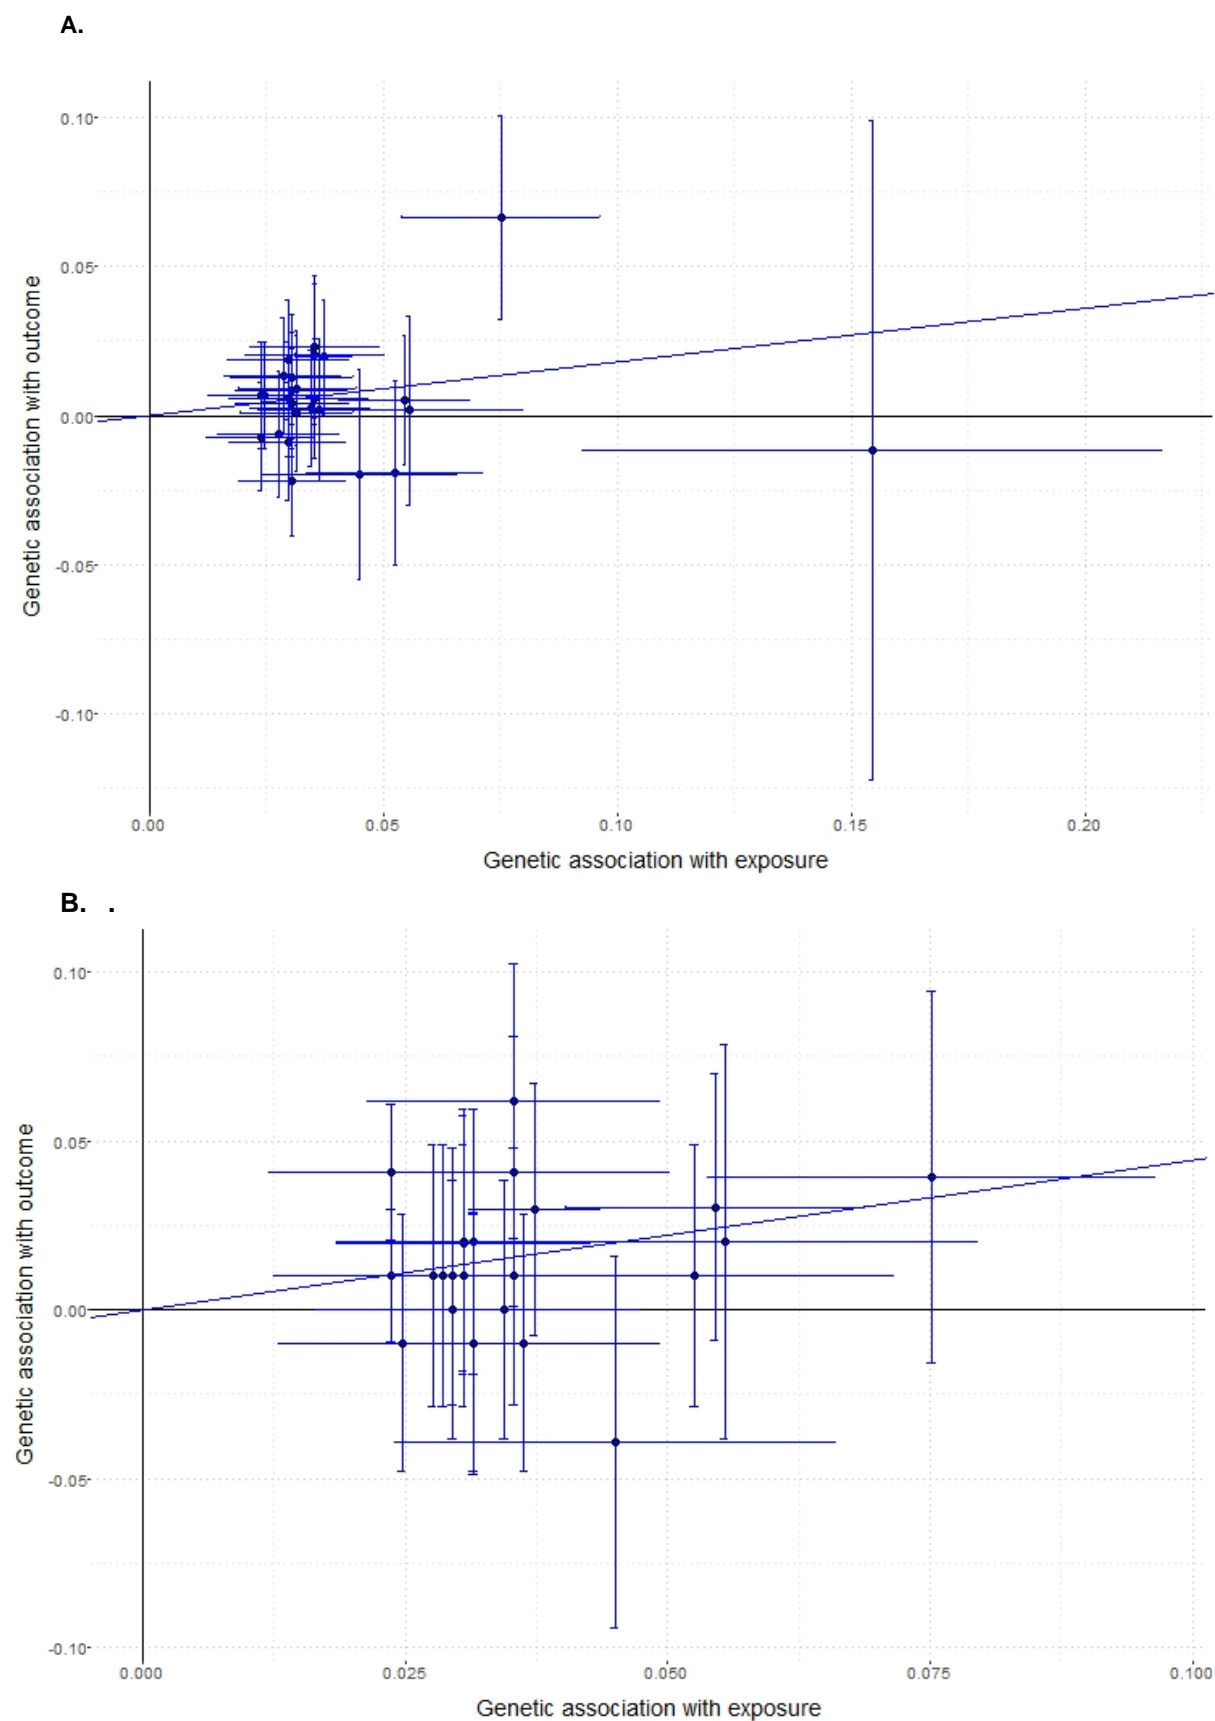

**Figure S6P. The association between the SNPs and long sleep duration versus the association between the SNPs and peripheral artery disease.**

The regression line was calculated using the inverse-variance weighted method.

Abbreviations: SNP = single nucleotide polymorphism. **A.** Associations between exposure and peripheral artery disease found using genome wide association study executed by the Million veteran program; **B.** Associations between exposure and peripheral artery disease found using the GoLEAD-SUMMIT Genome wide association study.

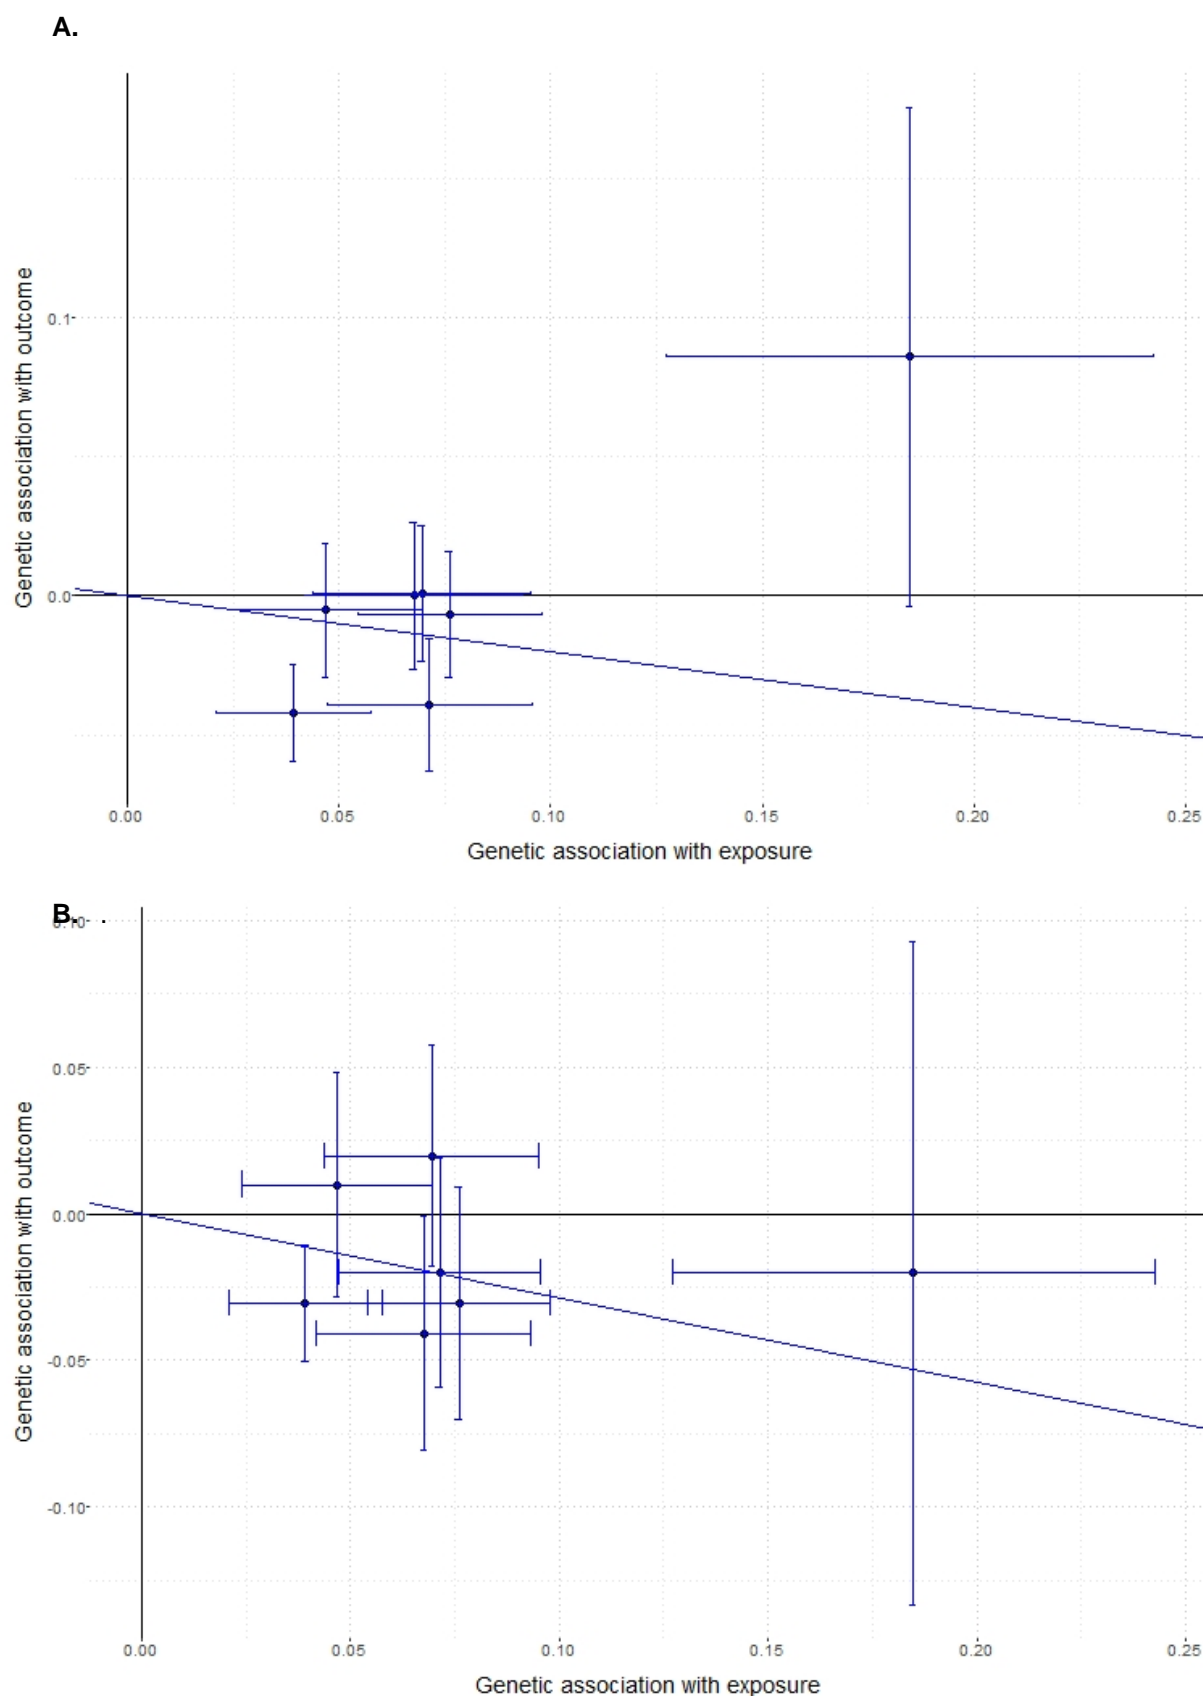

**Figure S6Q. The association between the SNPs and educational status versus the association between the SNPs and peripheral artery disease.**

The regression line was calculated using the inverse-variance weighted method.

Abbreviations: SNP = single nucleotide polymorphism. **A.** Associations between exposure and peripheral artery disease found using genome wide association study executed by the Million veteran program; **B.** Associations between exposure and peripheral artery disease found using the GoLEAD-SUMMIT Genome wide association study.

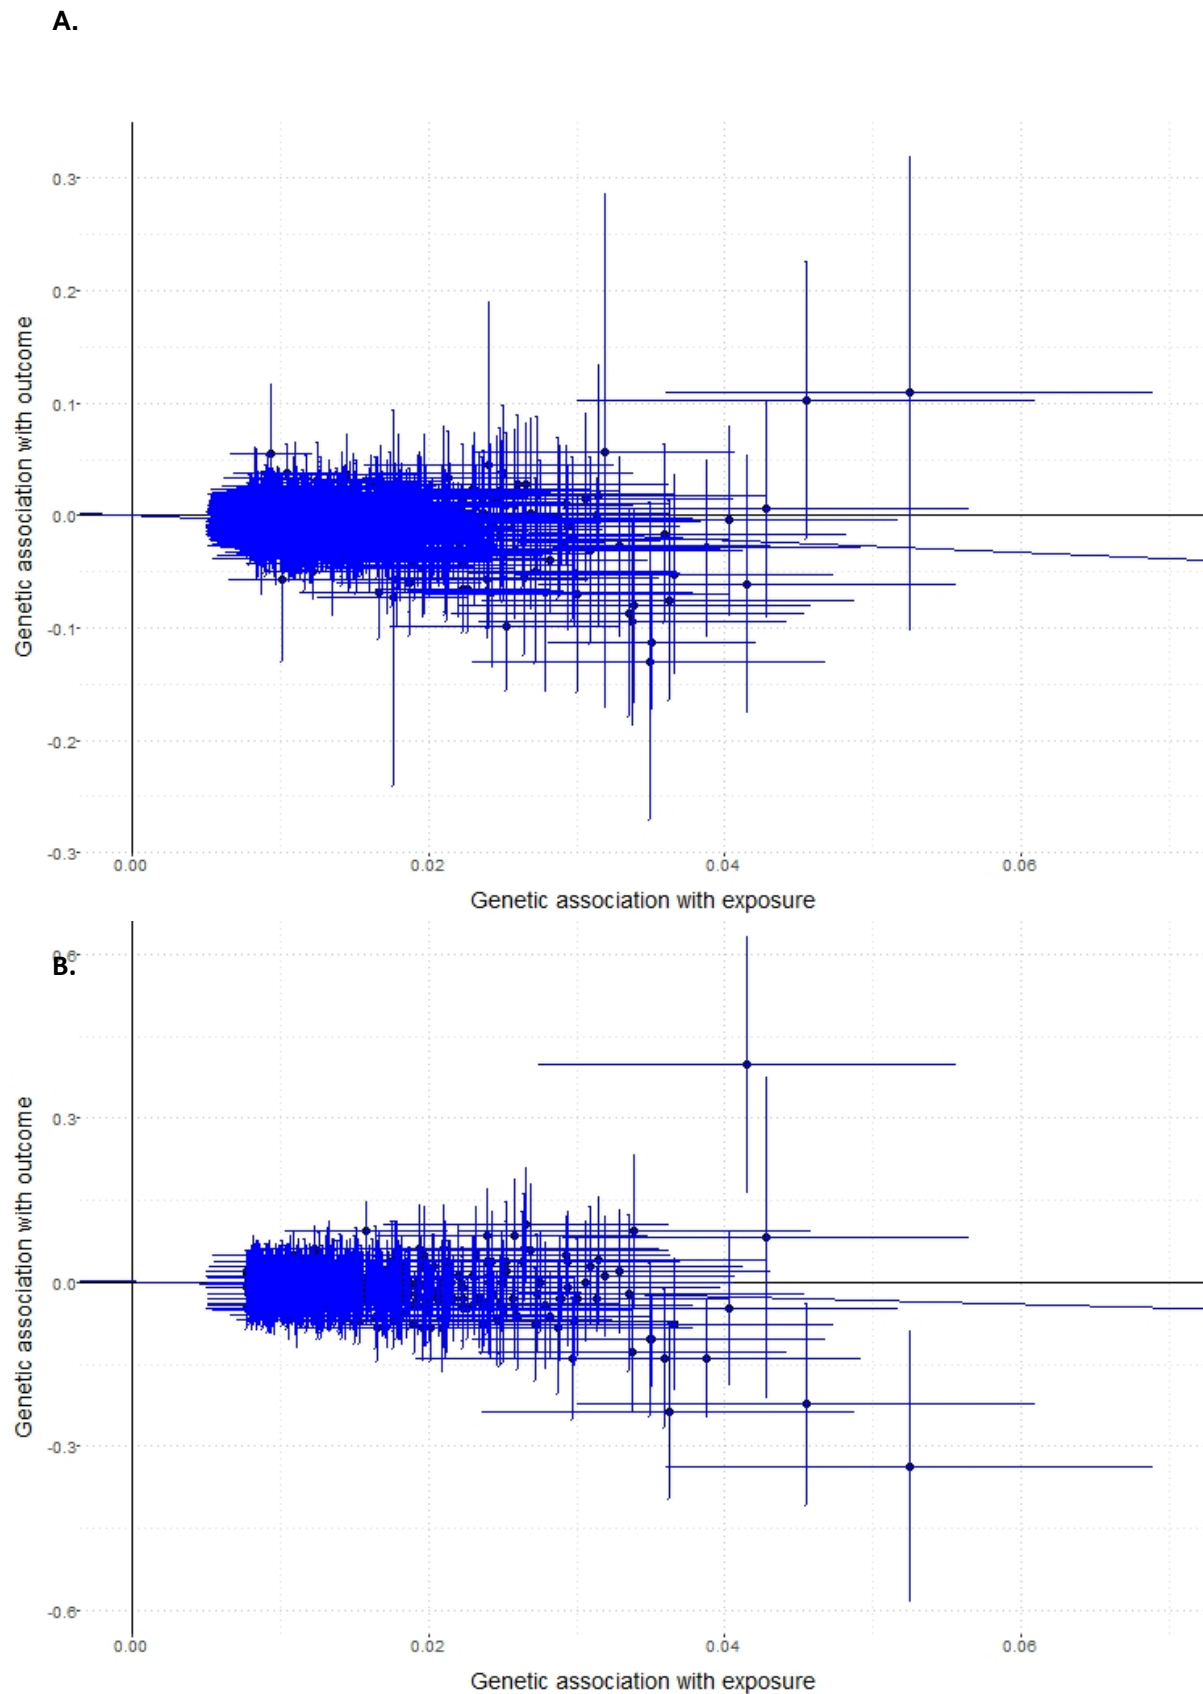

Supplement: JAH3-11-e025644-s001.pdf [file JAH3-11-e025644-s001.pdf]
